# Supplementary material for: YAP nuclear translocation induced by HIF-1α prevents DNA damage under hypoxic conditions
Source: PubMed Central journal article supplement (PMC10589224; doi:10.1038/s41420-023-01687-5), 2023-10-20

1 **Supplementary Information**

2

3 **Supplementary Figure 1. CoCl<sub>2</sub> induces HIF-1 $\alpha$  to interact with YAP, but not TAZ,**  
4 **under high-cell density.**

5 **A** The quantification of the proportion of YAP localization in Figure 1A was shown.

6 Data are presented as mean  $\pm$  SEM. \*\* $p < 0.01$  vs. control group under high-cell density

7 conditions. **B** Quantified nuclear fluorescence intensities of HIF-1 $\alpha$  and YAP of Figure

8 1B were depicted. **C** MDCK cells at low density ( $5 \times 10^4$ ) and high density ( $3 \times 10^5$ )

9 were treated with or without 400  $\mu$ M CoCl<sub>2</sub> for 8 h. Immunofluorescent images of TAZ

10 (red) and HIF-1 $\alpha$  (green) were taken using confocal microscope. Scale bar: 10  $\mu$ m.

11

12 **Supplementary Figure 2. Hypoxia also promotes HIF-1 $\alpha$  and YAP interaction in**  
13 **HK-2 cells.**

14 **A–B** HK-2 cells at high density ( $3 \times 10^5$ ) were treated with or without 400  $\mu$ M CoCl<sub>2</sub>

15 for 8 h. Immunofluorescent images of YAP (red) and HIF-1 $\alpha$  (green) were taken using

16 confocal microscope. Scale bar: 10  $\mu$ m. The proportion of YAP localization in

17 cytoplasmic, nuclear, or both cytoplasmic and nuclear at low and high density were

18 quantified in **(B)**. **C** HK-2 cells at low and high density were treated with or without

19 1% O<sub>2</sub> for 8 h. Protein levels of Hippo pathway in each group were determined by

1 Western blotting. The ratio of phospho-MST1/MST1, phospho-LATS1/LATS1, and  
2 phospho-YAP/YAP were listed below the corresponding blots. **D** High-density HK-2  
3 cells were transiently transfected with shHIF-1 $\alpha$ , and subjected to 1% O<sub>2</sub> for 24 h,  
4 followed by immunostaining with anti- $\gamma$ H2AX antibody. Scale bar: 10  $\mu$ m. **E** High-  
5 density HK-2 cells were transiently transfected with shHIF-1 $\alpha$ , and subjected to 1% O<sub>2</sub>  
6 for 36 h, followed by Annexin V staining. Scale bar: 10  $\mu$ m. All immunofluorescence  
7 images were obtained using confocal microscope.

8

9 **Supplementary Figure 3. Immunoprecipitations showed an increase of HIF-1 $\alpha$**   
10 **and YAP under CoCl<sub>2</sub>-treated high-density condition.**

11 MDCK cells at low and high density were incubated with or without 400  $\mu$ M CoCl<sub>2</sub> for  
12 8 h. The immunoprecipitations were performed and analyzed by Western blotting with  
13 anti-HIF-1 $\alpha$  antibody.

14

15 **Supplementary Figure 4. HIF-1 $\alpha$  facilitates YAP downstream gene expression**  
16 **under hypoxic condition.**

17 MDCK-Parental and MDCK-shHIF-1 $\alpha$  cells at high density were subjected to 1% O<sub>2</sub>  
18 for 0, 2, 4, and 6 h. Representative PCR results of gene expression for *yap* and the  
19 downstream gene *cyr61* were shown. *gapdh* was used as an internal control.

1 **Supplementary Figure 5. Effects of Src and ERK inhibitors on YAP localization**  
2 **under CoCl<sub>2</sub> treatment.**

3 MDCK cells at high cell density were treated with 1 μM dasatinib, 100 μM U0126, or  
4 1 μM SCH772984 for 24 h, followed by 400 μM CoCl<sub>2</sub> for 8 h. **A** Representative  
5 Western blots were shown. Quantification of **(B)** phospho-Src/Src, **(C)** phospho-  
6 ERK2/ERK2, and **(D)** phospho-YAP/YAP is presented as mean ± SEM. **B** \*\**p* < 0.01  
7 vs. the CoCl<sub>2</sub>-alone group. **C** \**p* < 0.05 vs. control group. ###*p* < 0.001 vs. control  
8 group. ##*p* < 0.01 vs. CoCl<sub>2</sub>-alone group. **D** \*\**p* < 0.01 and \**p* < 0.05. **E**  
9 Immunofluorescence images of YAP (red) and HIF-1α (green) were obtained using  
10 confocal microscope. Scale bar: 10 μm. **F** Proportion of YAP localization in cytoplasm  
11 and nucleus was quantified. Data are presented as mean ± SEM. \*\**p* < 0.01.

12

13 **Supplementary Figure 6. AKT inhibitor decreases YAP phosphorylation at serine**  
14 **127 in MDCK-shHIF-1α cells under high-cell density conditions.**

15 High density MDCK-shHIF-1α cells were treated with or without 10 μM LY294002 for  
16 24 h, followed by control or 400 μM CoCl<sub>2</sub> treatment for 8 h. **A–B** Immunofluorescence  
17 images of YAP (red) and HIF-1α (green) obtained using confocal microscope. Scale bar:  
18 10 μm. Proportion of YAP localization in cytoplasm, nucleus, or both after LY294002  
19 treatment was quantified in **(B)**. Bars represent the mean ± SEM. \*\*\**p* < 0.001, ###*p* <

1 0.001. **C** Representative blots of HIF-1 $\alpha$ , phospho-AKT, AKT, phospho-YAP, and YAP  
2 were shown.  $\alpha$ -tubulin was used as a loading control.

3

4 **Supplementary Figure 7. DNA distribution of parental and shHIF-1 $\alpha$  cells under**  
5 **normoxic and hypoxic conditions.**

6 MDCK-parental and MDCK-shHIF-1 $\alpha$  cells were treated with normoxia or 1% O<sub>2</sub> for  
7 48 h and stained with Hoechst 33342. Nuclei morphology was observed under an  
8 inverted fluorescence microscope. Pseudocolor shows distribution and intensity of  
9 DNA by Hoechst 33342 staining in nucleus. Scale bar: 10  $\mu$ m.

10

11 **Supplementary Figure 8. Hypoxic mimetic CoCl<sub>2</sub> induced DNA damage in MDCK**  
12 **cells.**

13 **A–B** MDCK-parental and MDCK-shHIF-1 $\alpha$  cells were treated with normoxia or 400  
14  $\mu$ M CoCl<sub>2</sub> for 24 h, followed by immunostaining with anti- $\gamma$ H2AX antibody. **A**  
15 Representative confocal images were shown. Scale bar: 40  $\mu$ m. **B**  $\gamma$ H2AX intensity was  
16 analyzed and presented as mean  $\pm$  SEM. \*\*\* $p < 0.001$ .

17

18 **Supplementary Figure 9. Constitutively active YAP reduced DNA damage under**  
19 **hypoxic conditions.**

1 **A–B** MDCK-shHIF-1 $\alpha$ -YAP-WT and MDCK-shHIF-1 $\alpha$ -YAP-S127A cells were  
2 exposed to 1% O<sub>2</sub> for 24 h, followed by immunostaining with anti- $\gamma$ H2AX antibody. **A**  
3 Representative confocal images were shown. Scale bar: 40  $\mu$ m. **B**  $\gamma$ H2AX intensity was  
4 analyzed and presented as mean  $\pm$  SEM. \* $p$  < 0.05.

5

6 **Supplementary Figure 10. MDCK cells with either HIF-1 $\alpha$  or YAP deficiency were**  
7 **sensitive to hypoxic insults.**

8 **A** High-density MDCK-Parental, MDCK-shHIF-1 $\alpha$ , and MDCK-shYAP cells were  
9 subjected to 1% O<sub>2</sub> for 24 h, followed by immunostaining with anti-Rad51 antibody.  
10 Scale bar: 10  $\mu$ m. **B** MDCK-Parental, MDCK-shHIF-1 $\alpha$ , and MDCK-shYAP cells were  
11 seeded in high density and were treated with 1% O<sub>2</sub> for 36 h. The expression of PARP  
12 and caspase 3 were determined by Western blotting.  $\alpha$ -tubulin was used as a loading  
13 control.

14

A

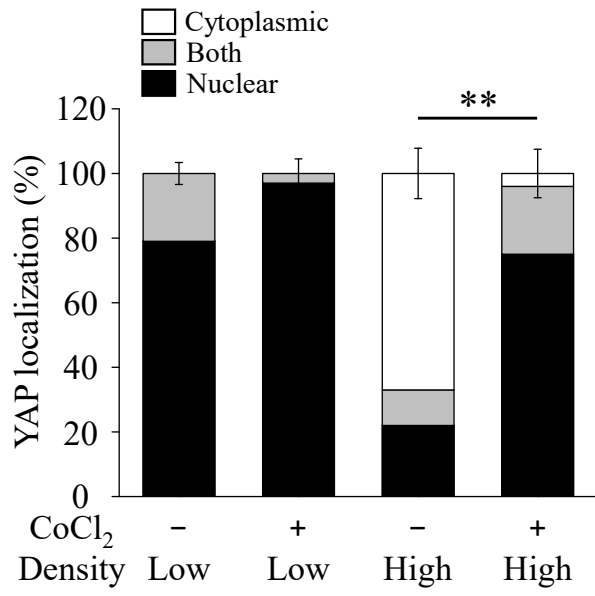

C

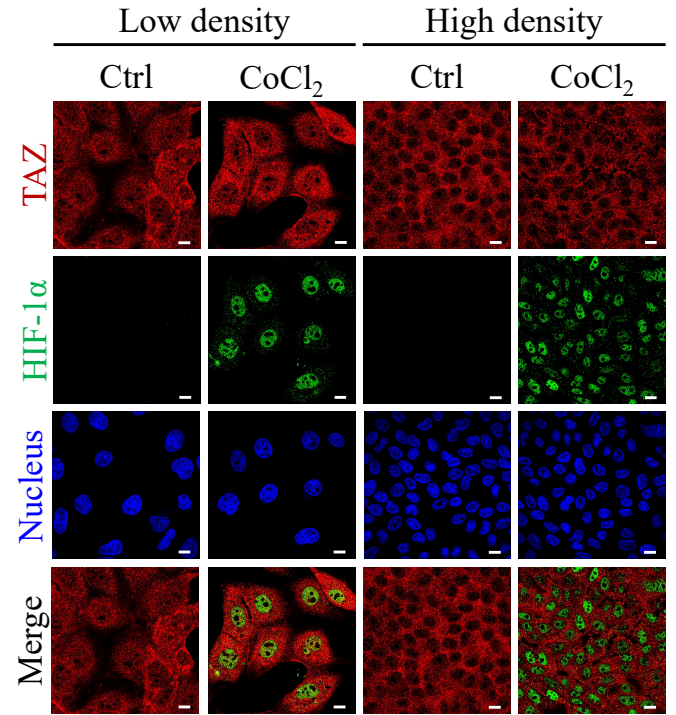

B

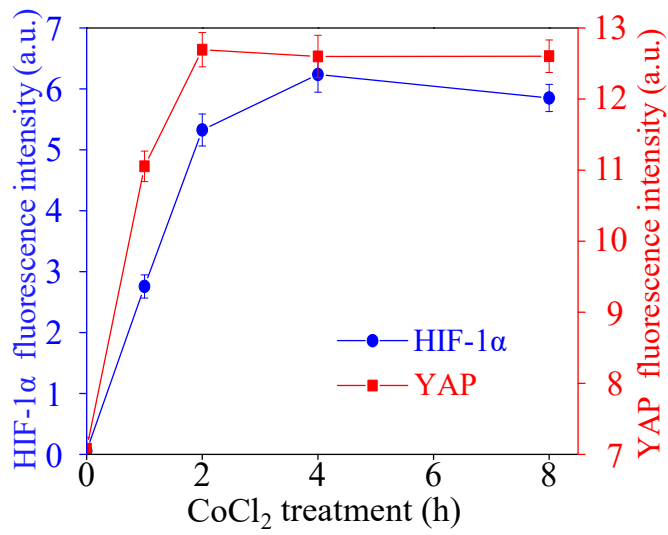

A

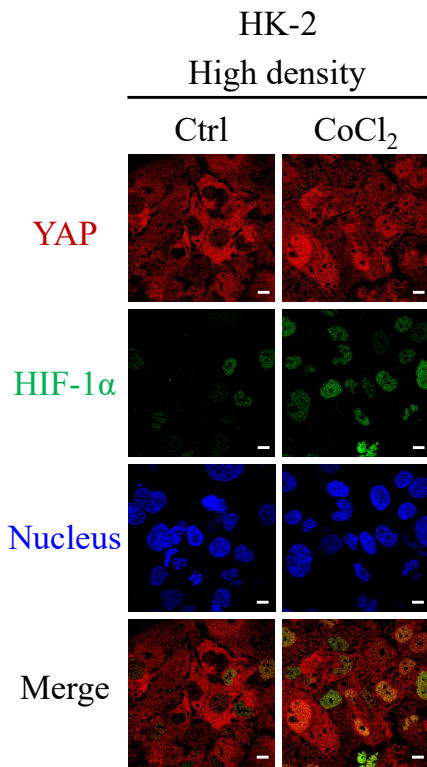

B

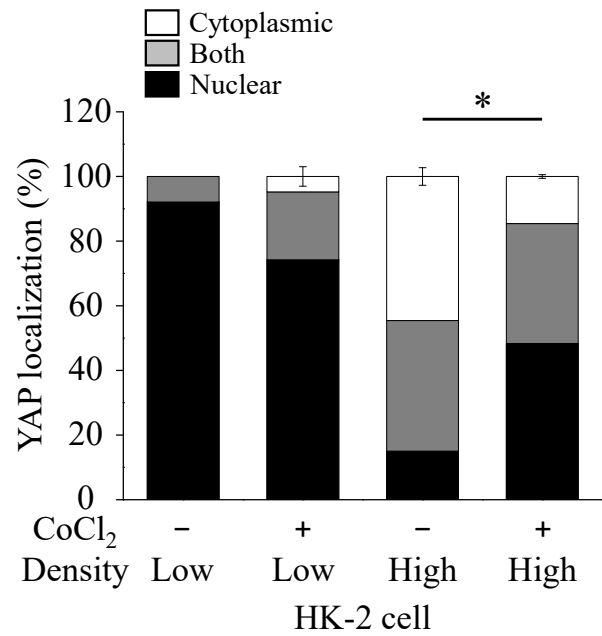

C

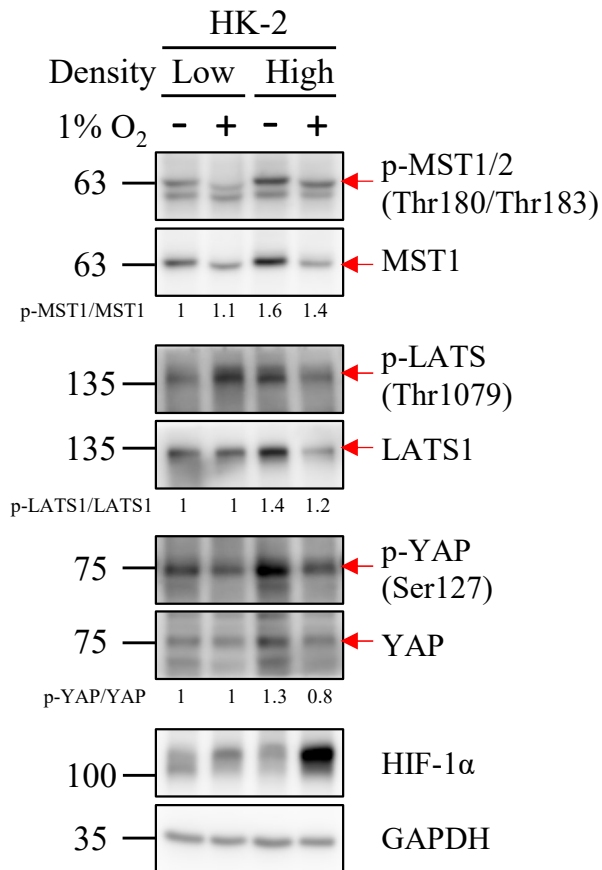

D

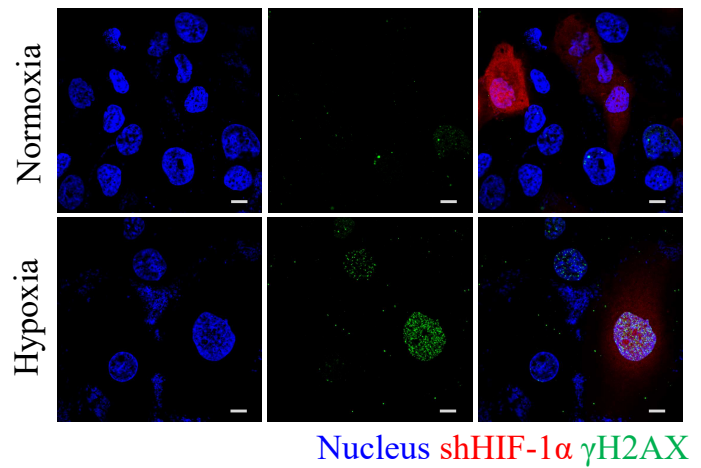

E

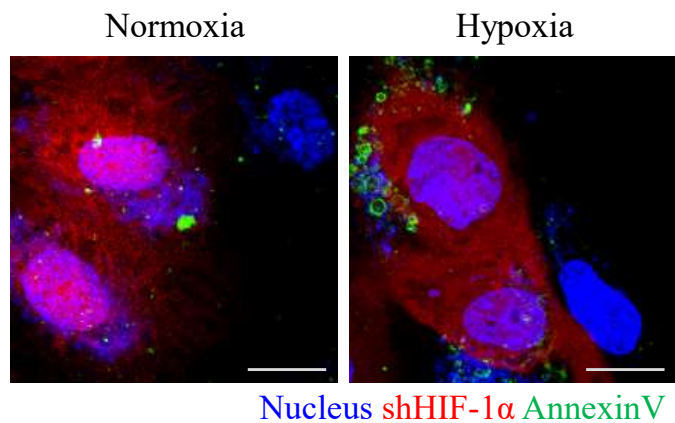

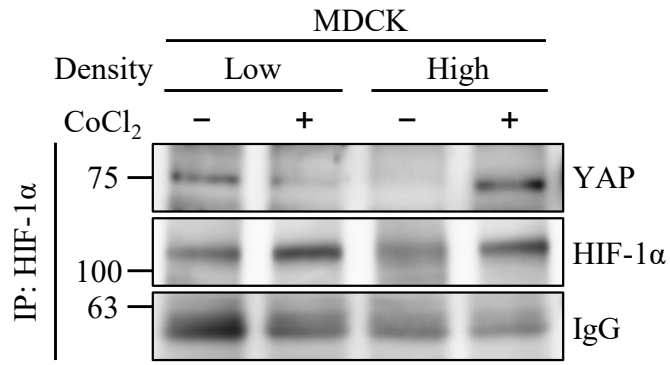



Base pairs (bp)

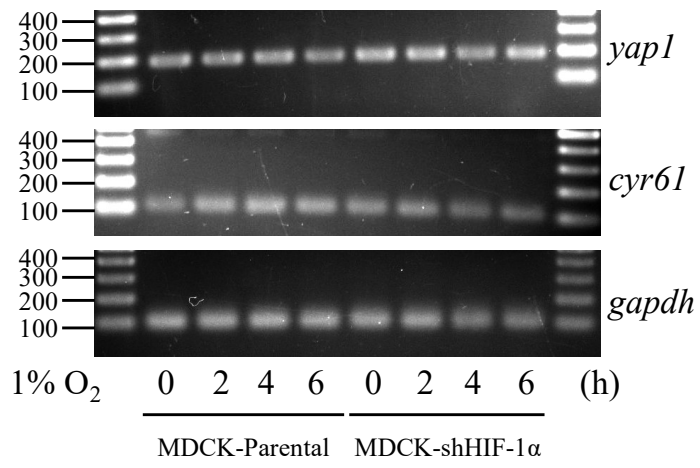

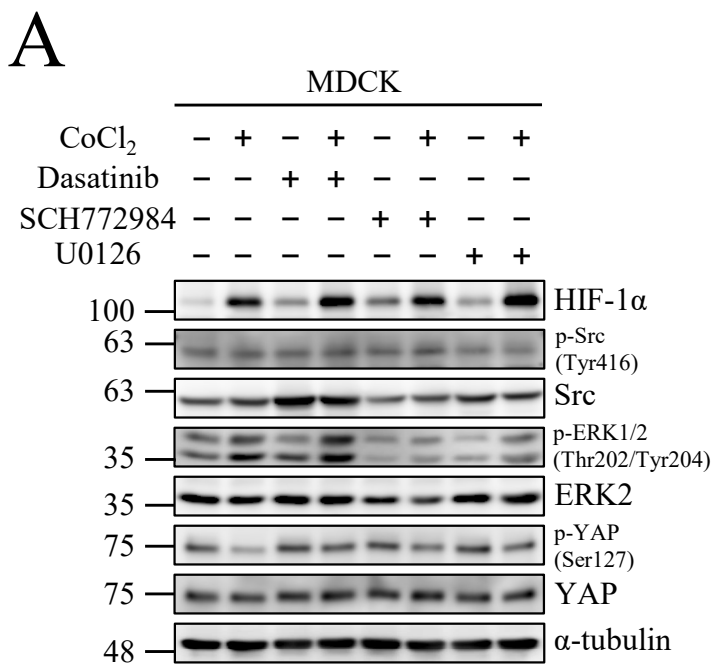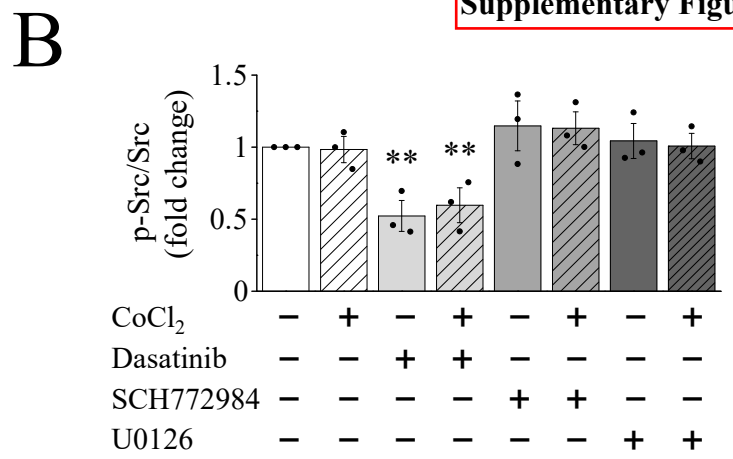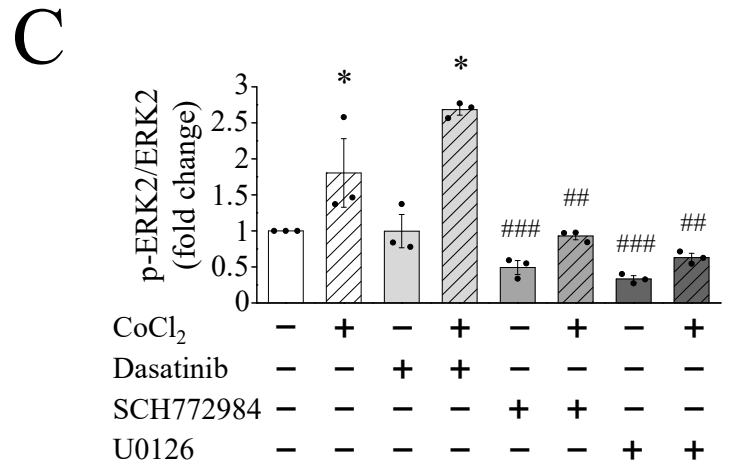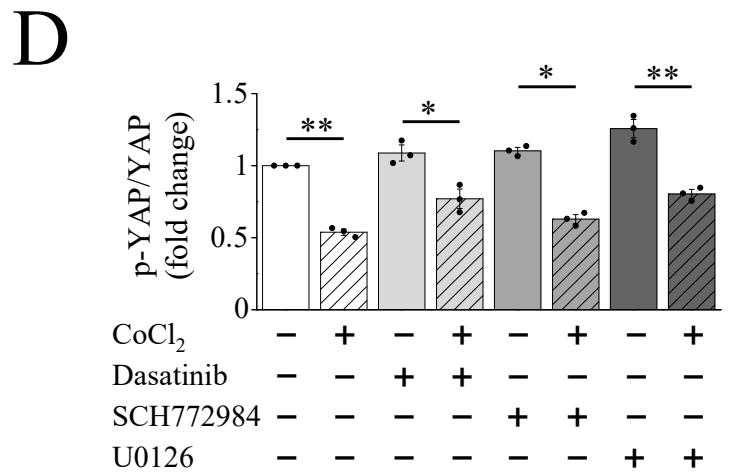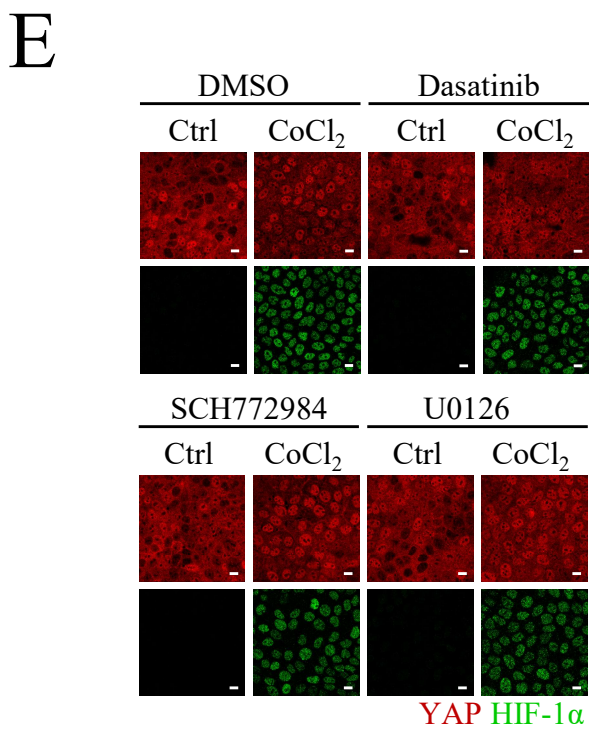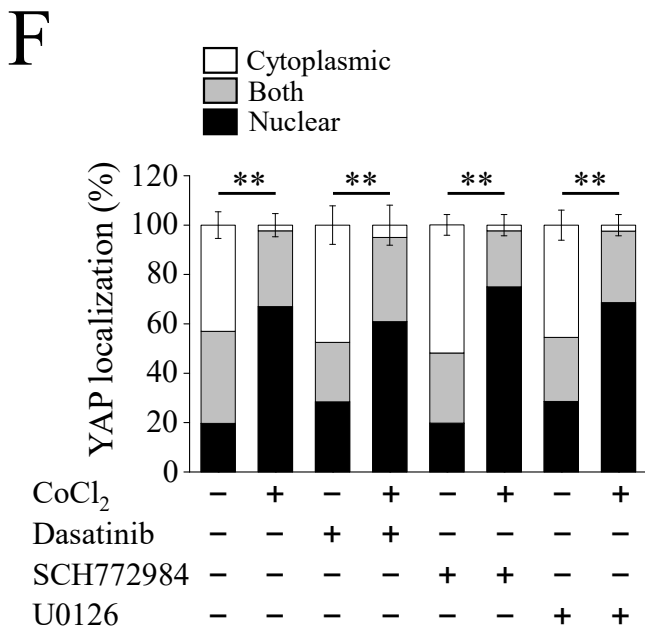

A

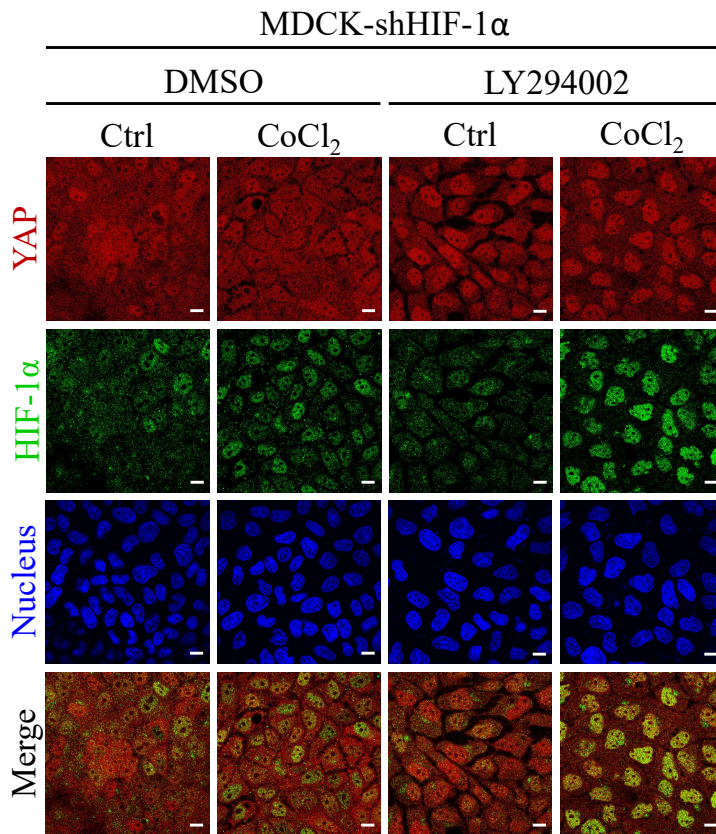

B

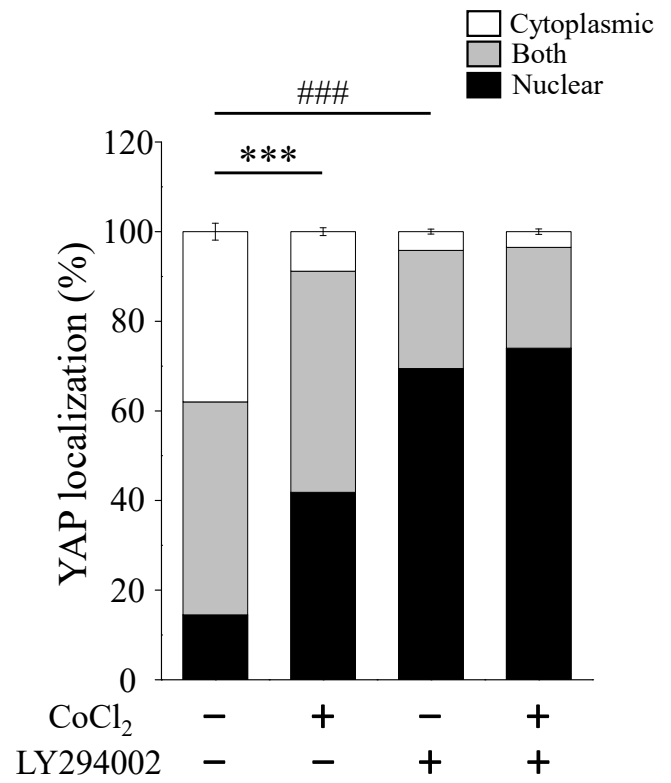

C

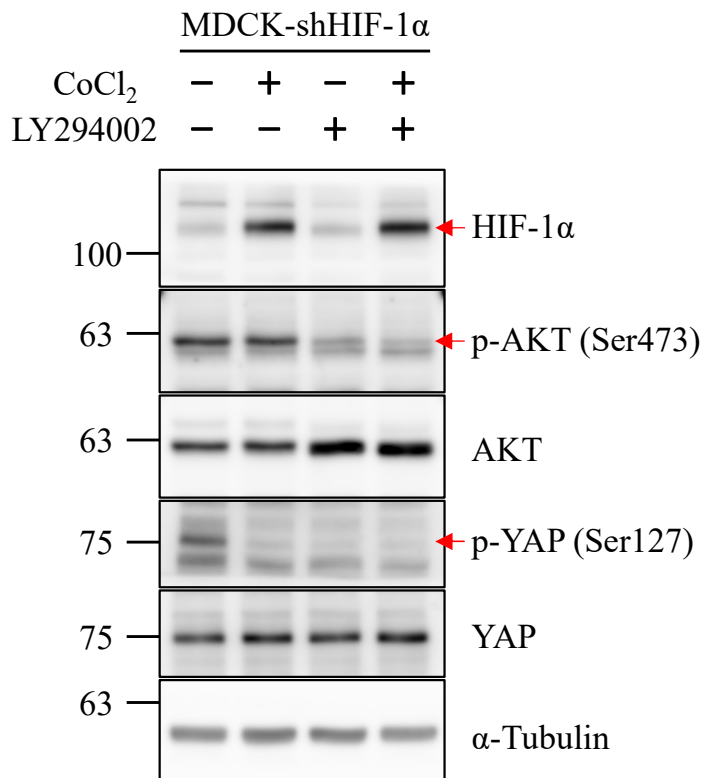

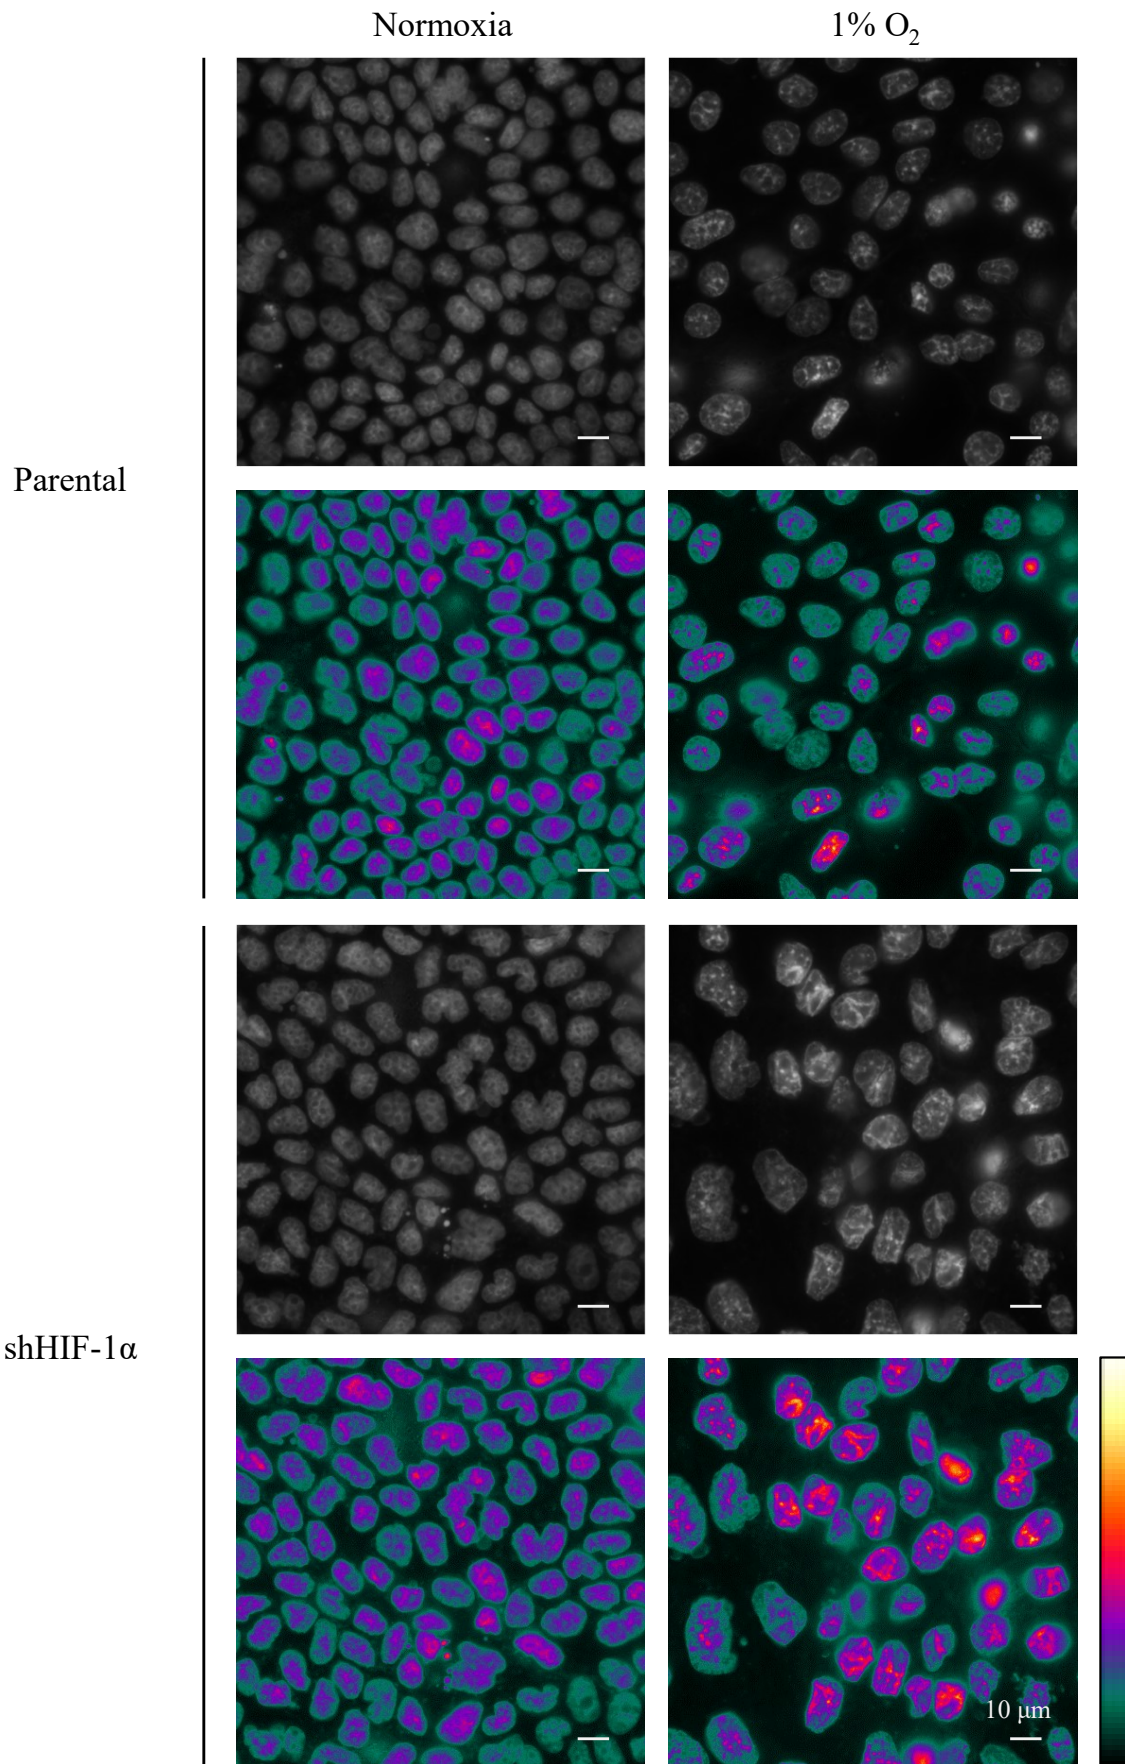

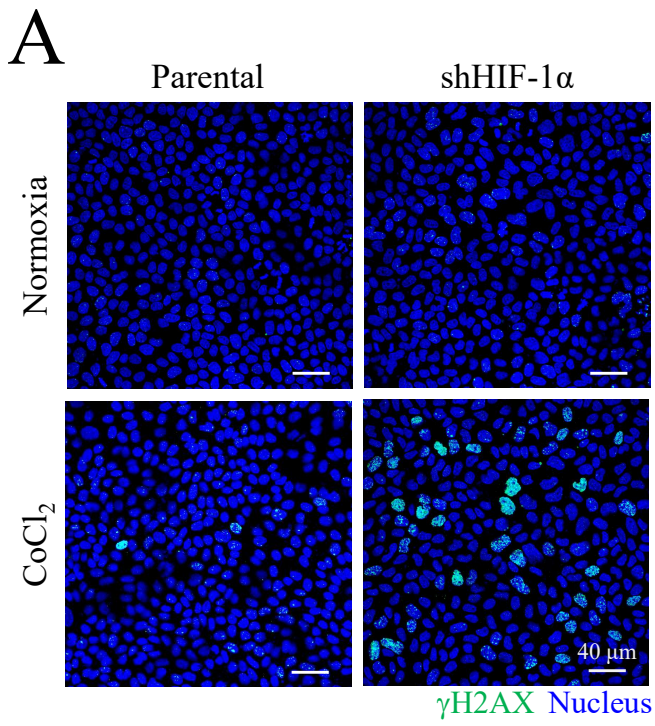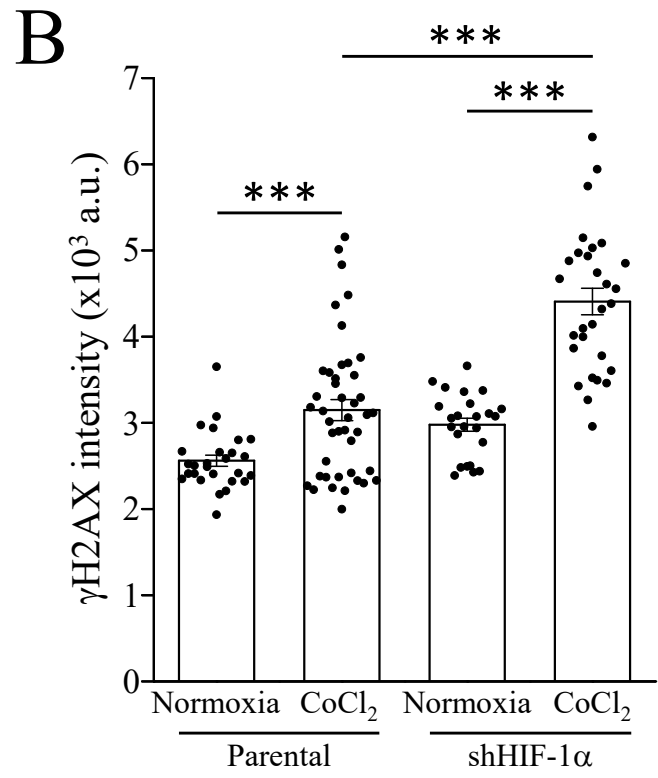

A

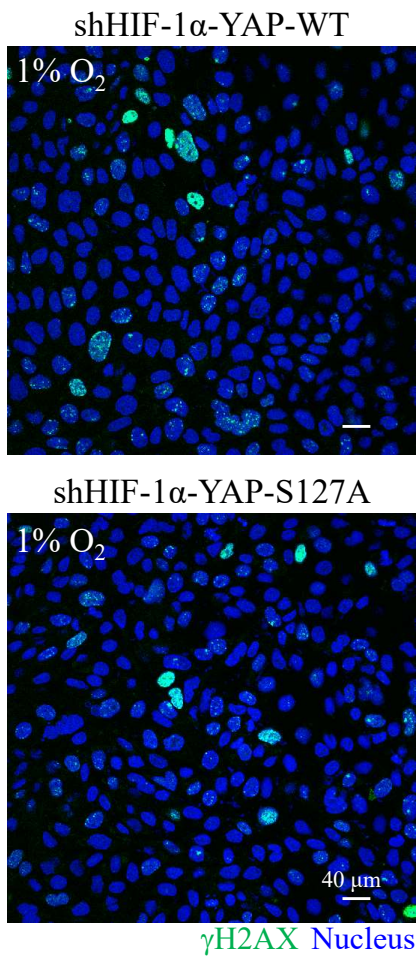

B

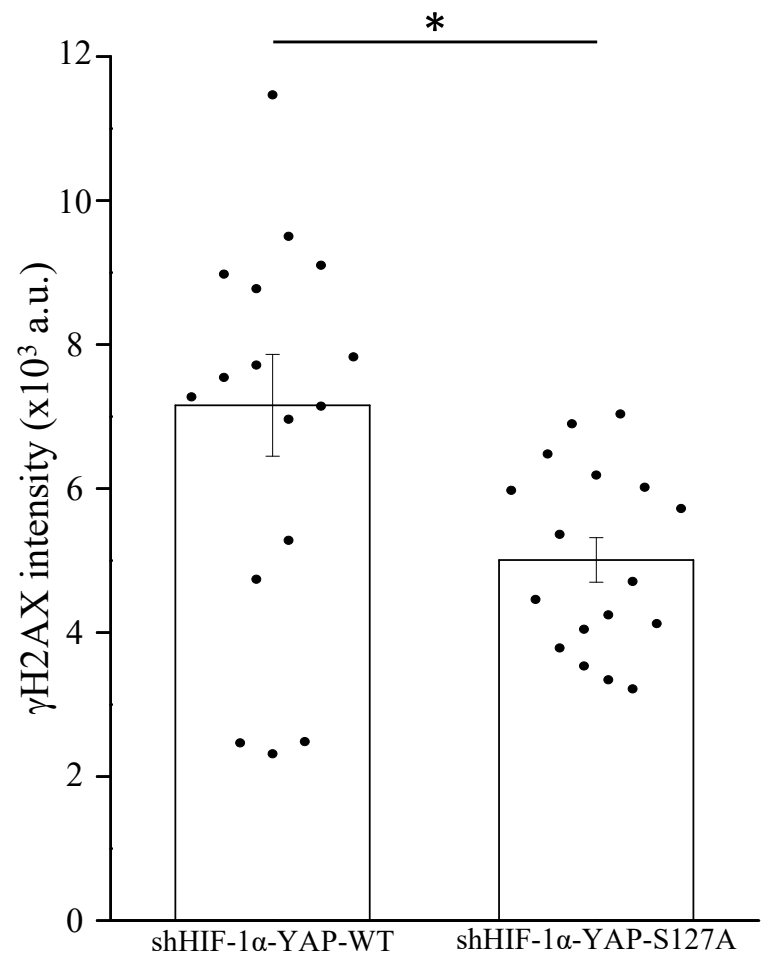

A

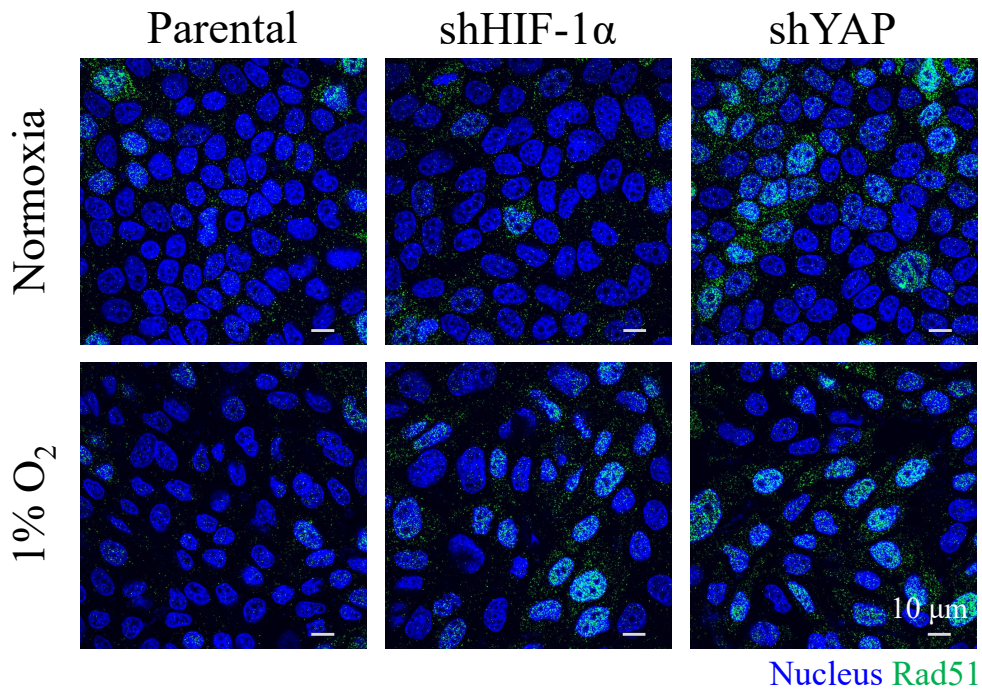

B

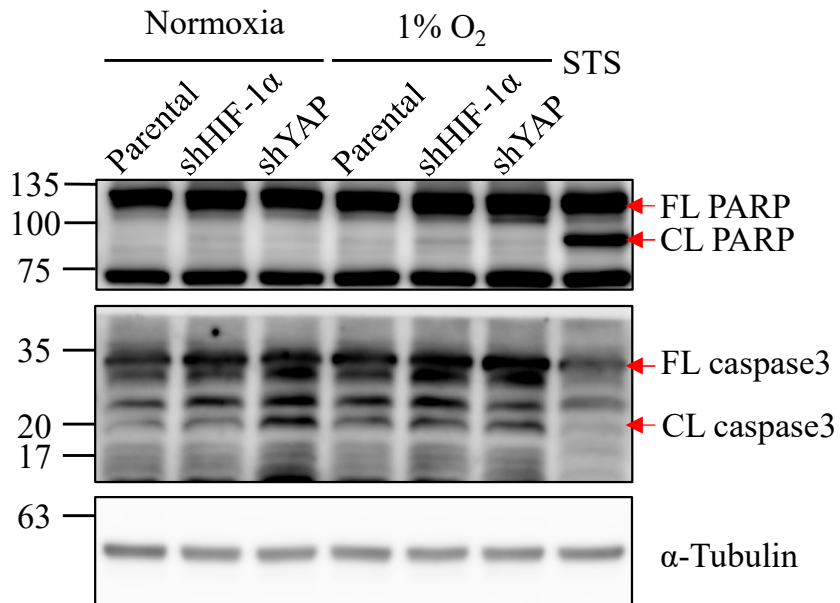

Supplement: 41420_2023_1687_MOESM1_ESM.pdf [file 41420_2023_1687_MOESM1_ESM.pdf]
