# Supplementary material for: YAP nuclear translocation induced by HIF-1α prevents DNA damage under hypoxic conditions
Source: PubMed Central journal article supplement (PMC10589224; doi:10.1038/s41420-023-01687-5), 2023-10-20

Fig 2A

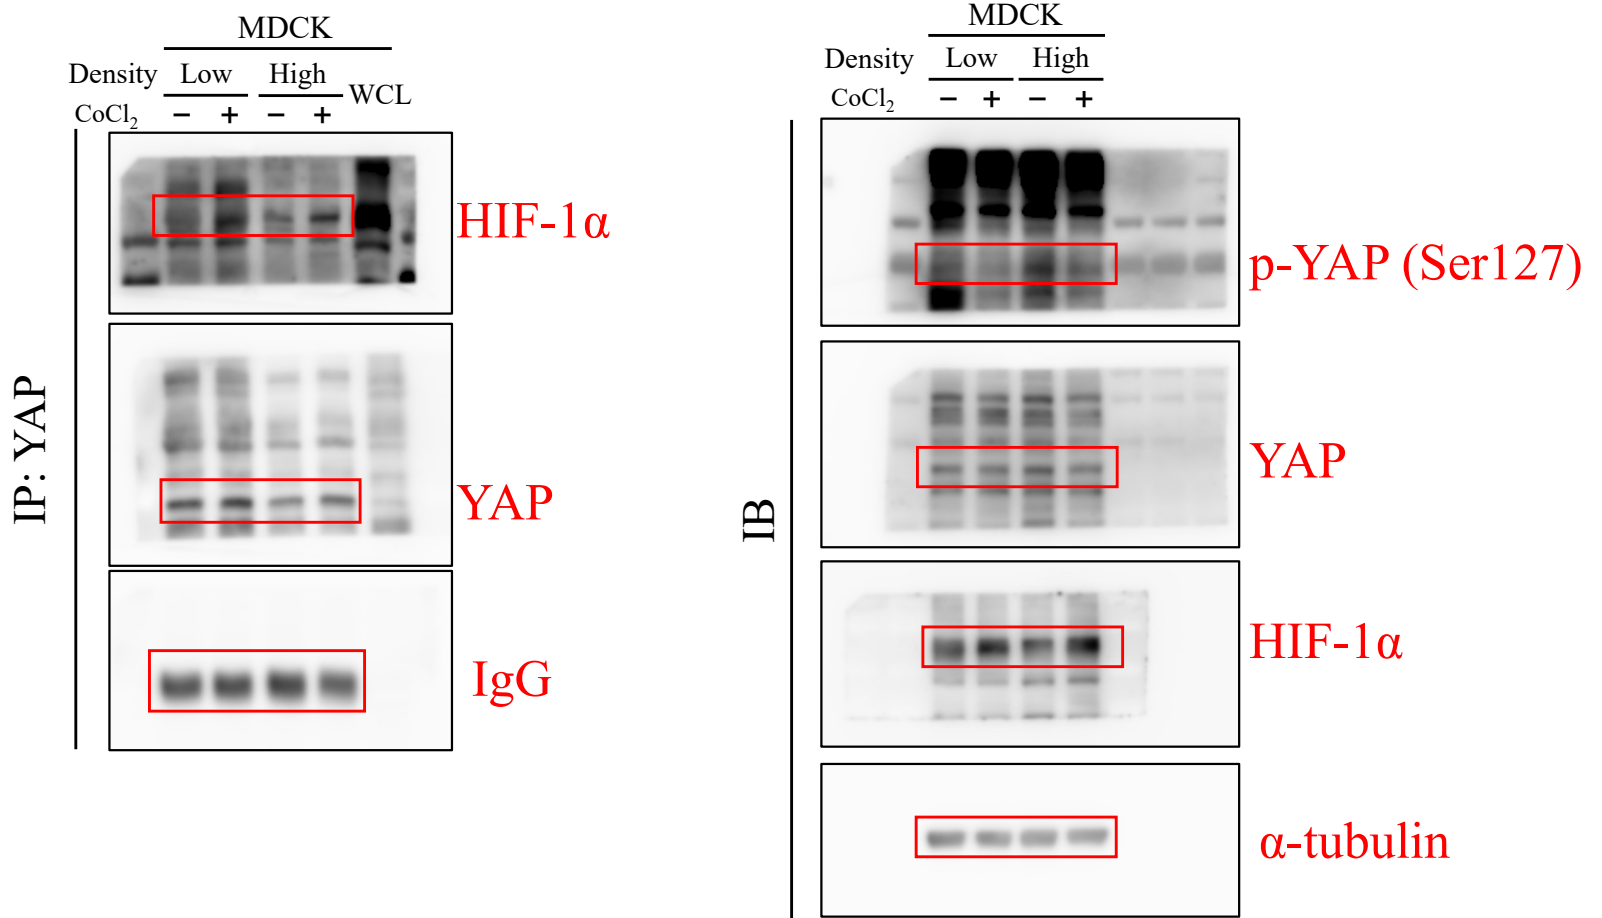

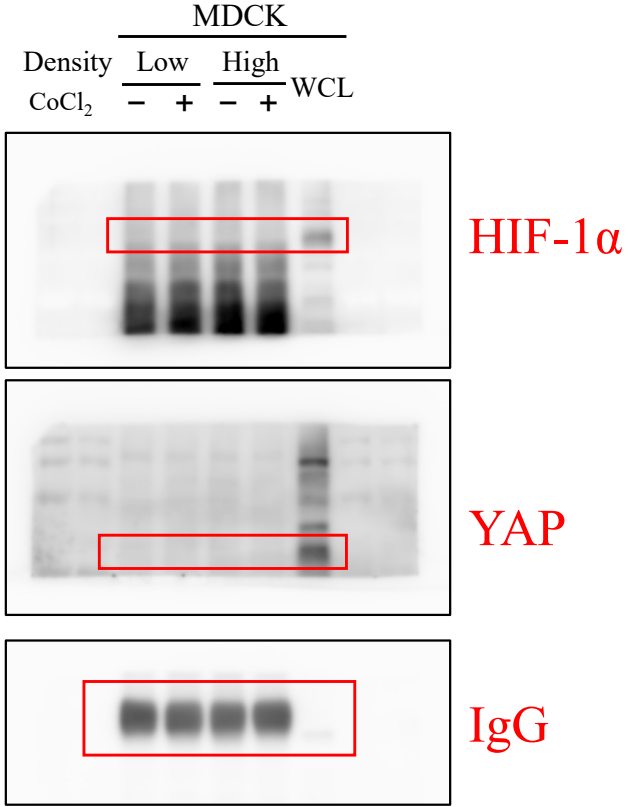

| Density           | Nucleus |   |      |   | Cytosol |   |      |   |
|-------------------|---------|---|------|---|---------|---|------|---|
|                   | Low     |   | High |   | Low     |   | High |   |
|                   | -       | + | -    | + | -       | + | -    | + |
| CoCl <sub>2</sub> | -       | + | -    | + | -       | + | -    | + |

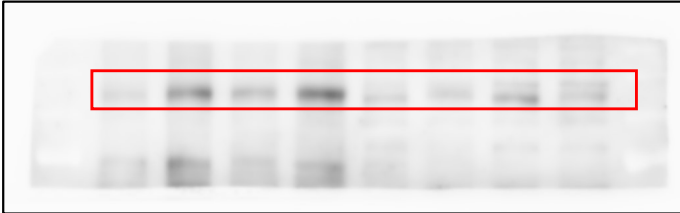

HIF-1 $\alpha$

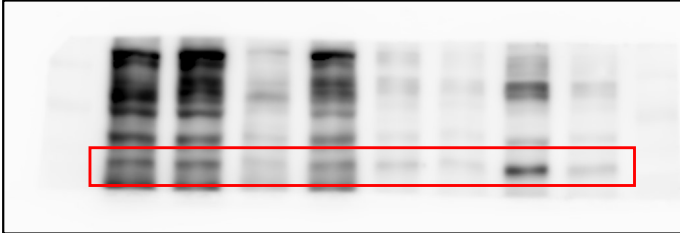

YAP

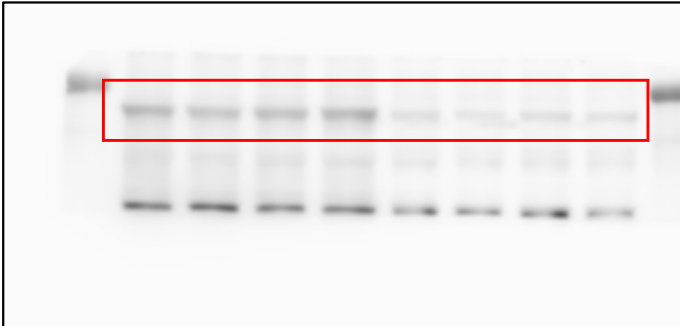

Lamin B1

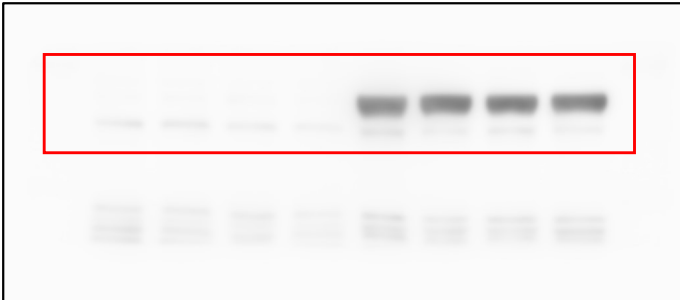

$\alpha$ -tubulin

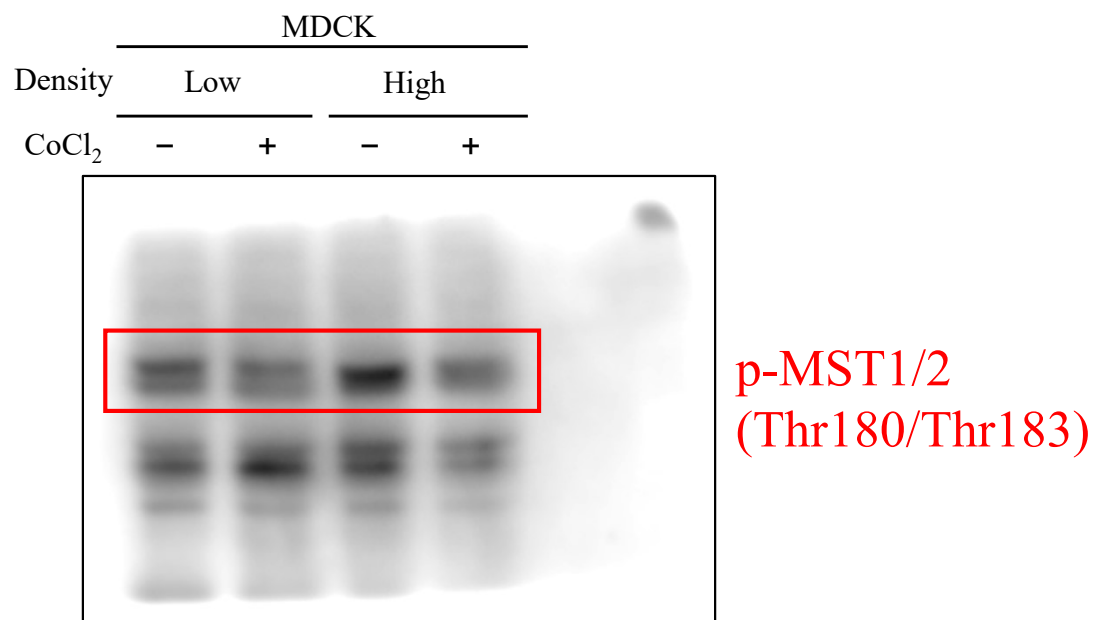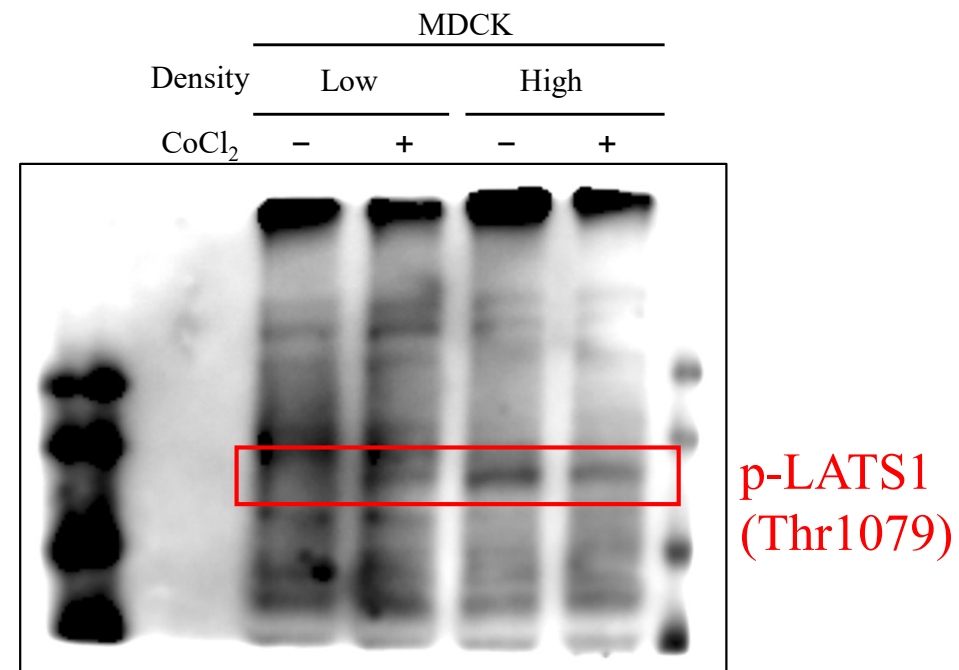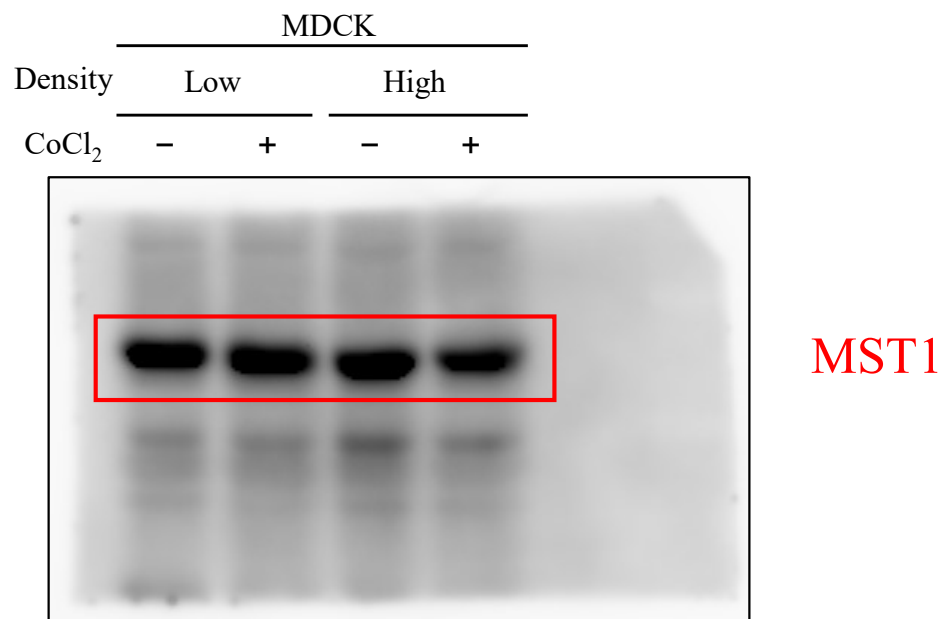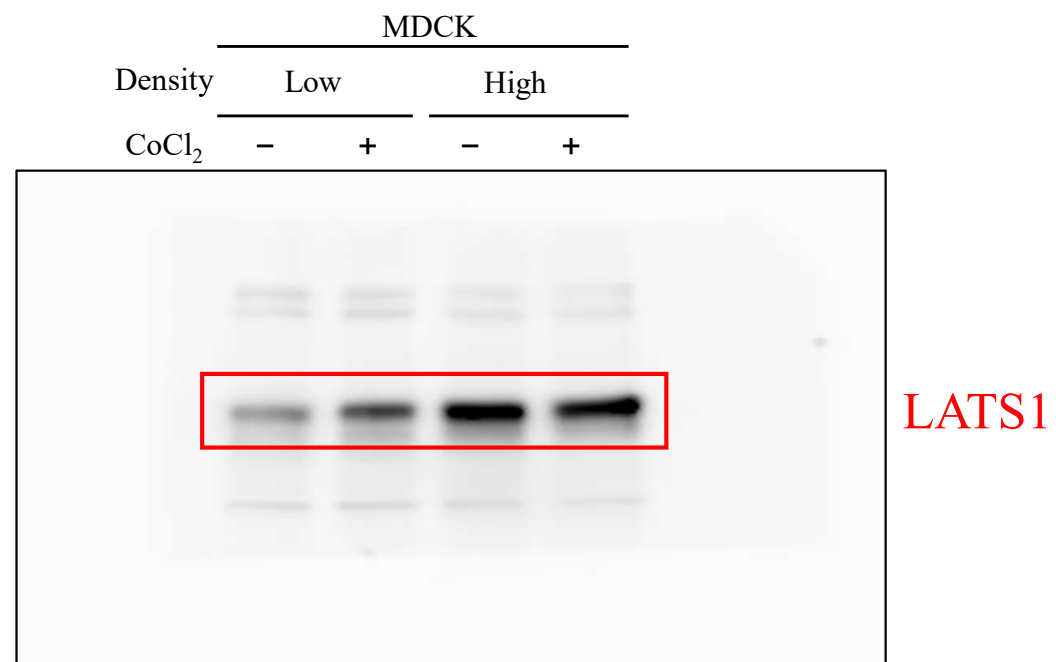

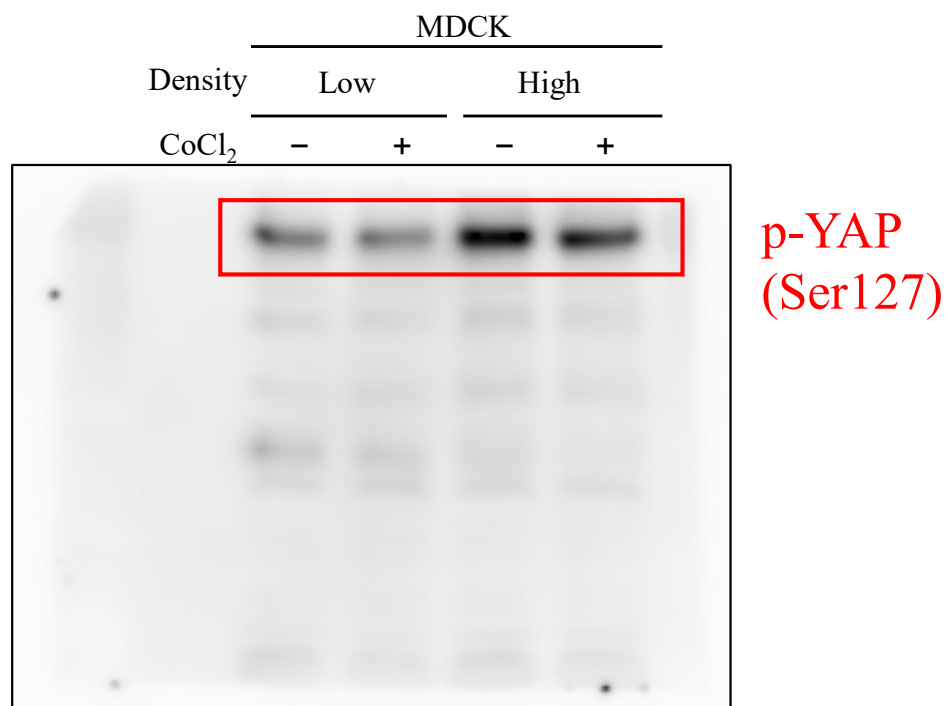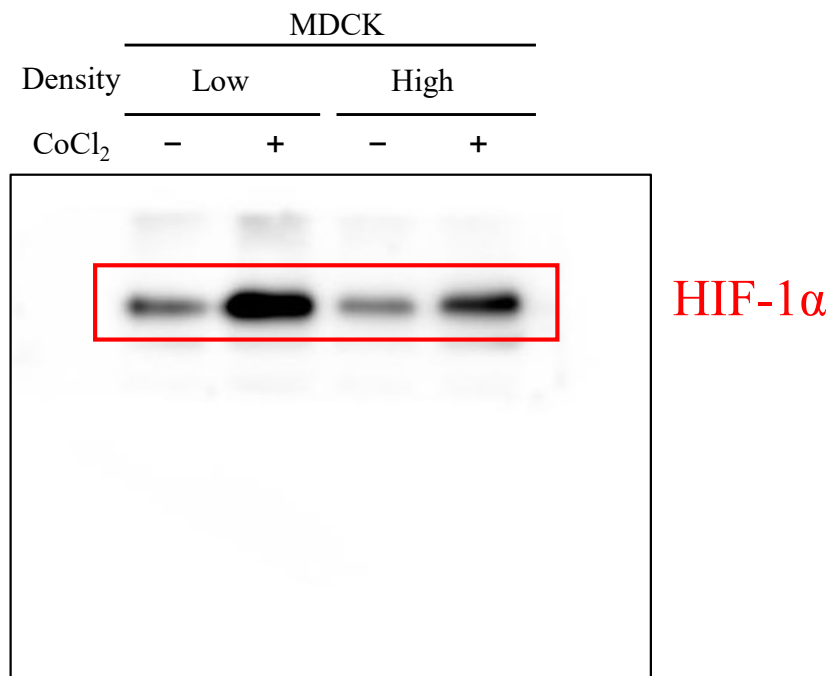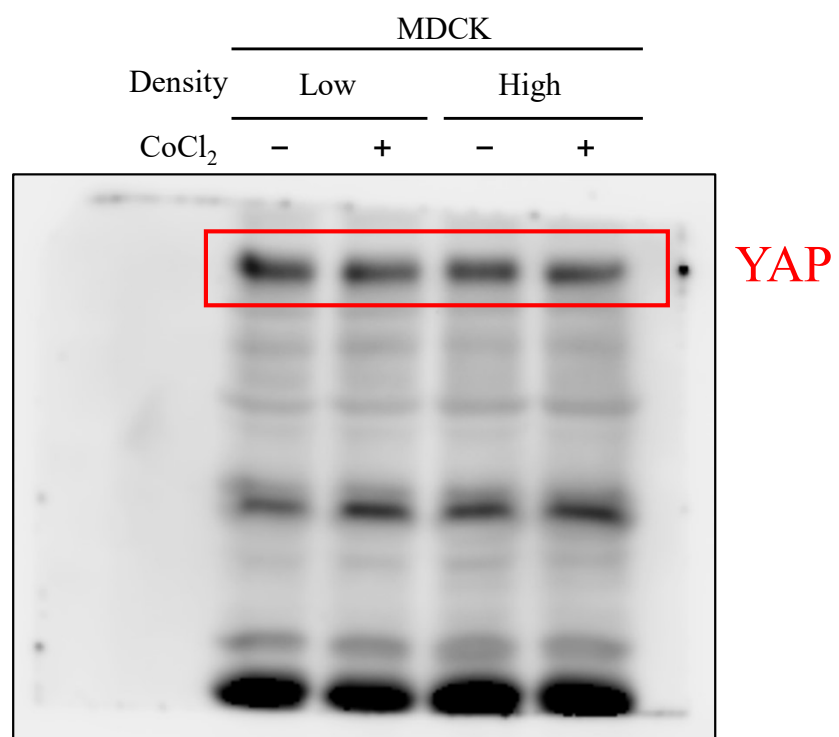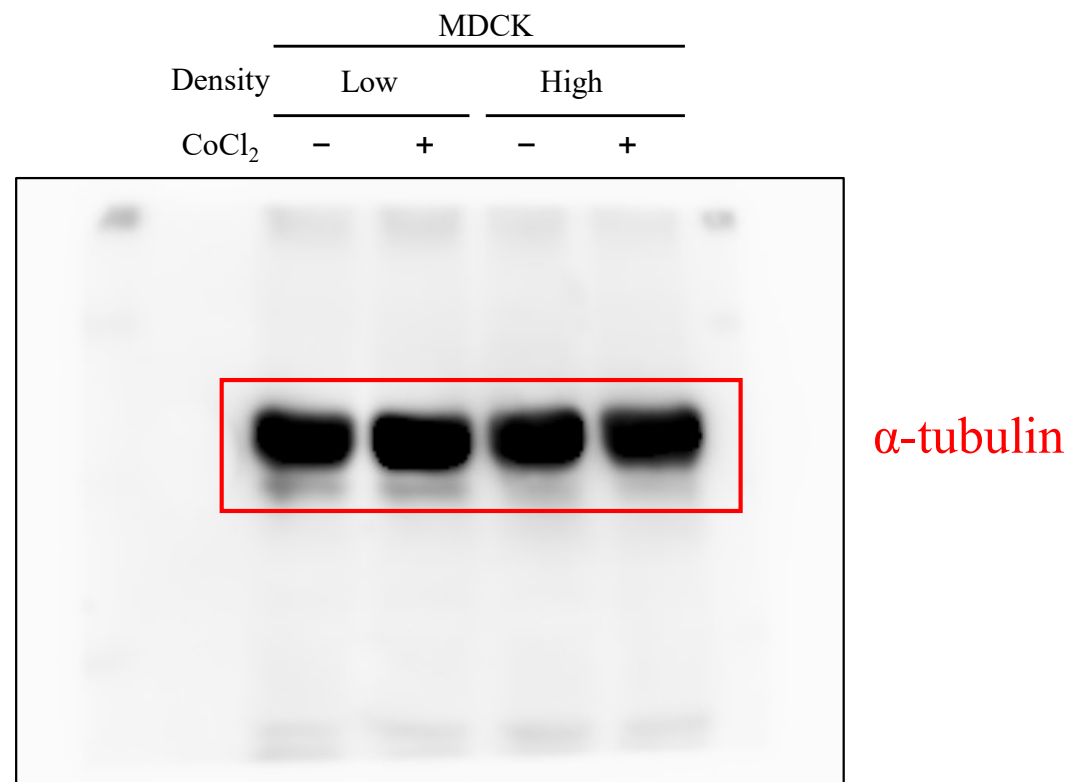

|                   | MDCK |   |   |   |
|-------------------|------|---|---|---|
| CoCl <sub>2</sub> | -    | + | - | + |
| LY294002          | -    | - | + | + |

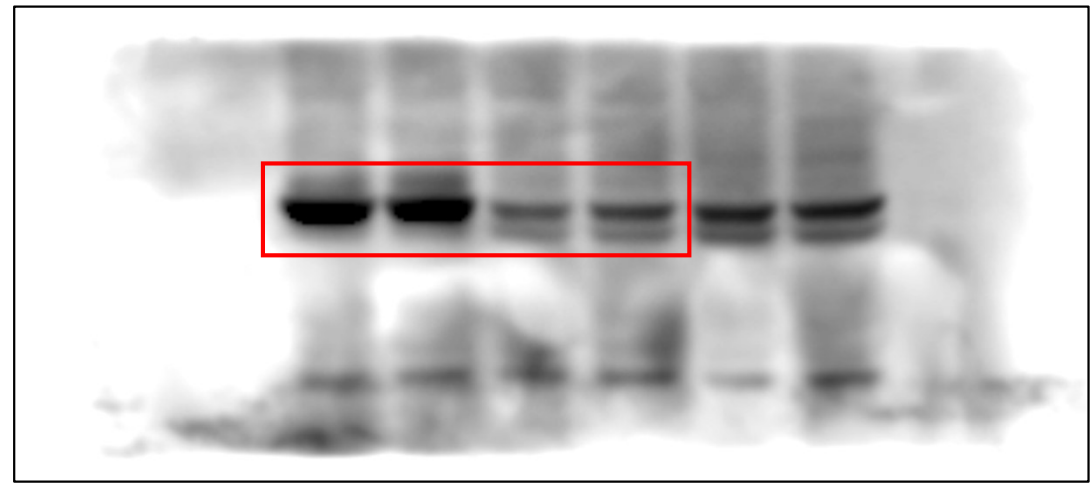

p-AKT  
(Ser473)

|                   | MDCK |   |   |   |
|-------------------|------|---|---|---|
| CoCl <sub>2</sub> | -    | + | - | + |
| LY294002          | -    | - | + | + |

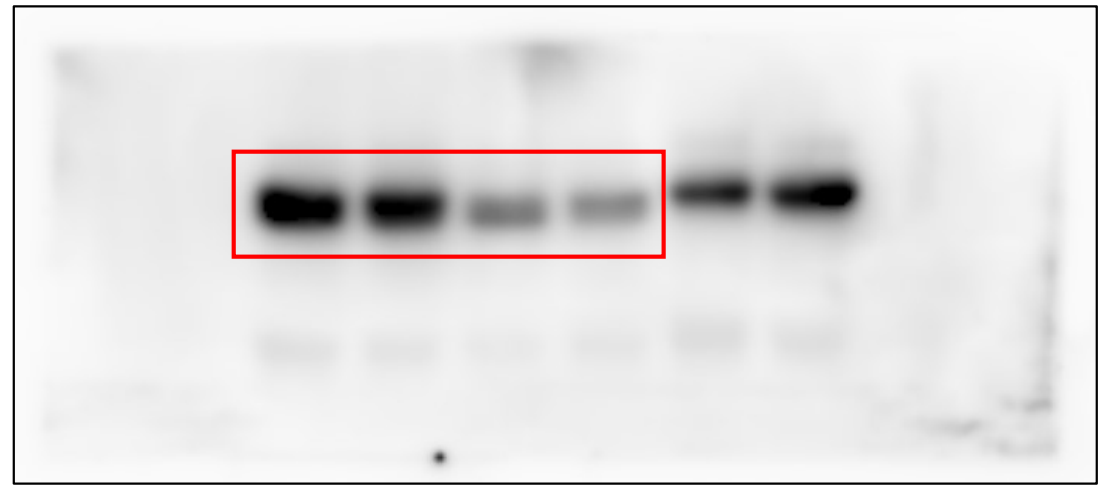

AKT

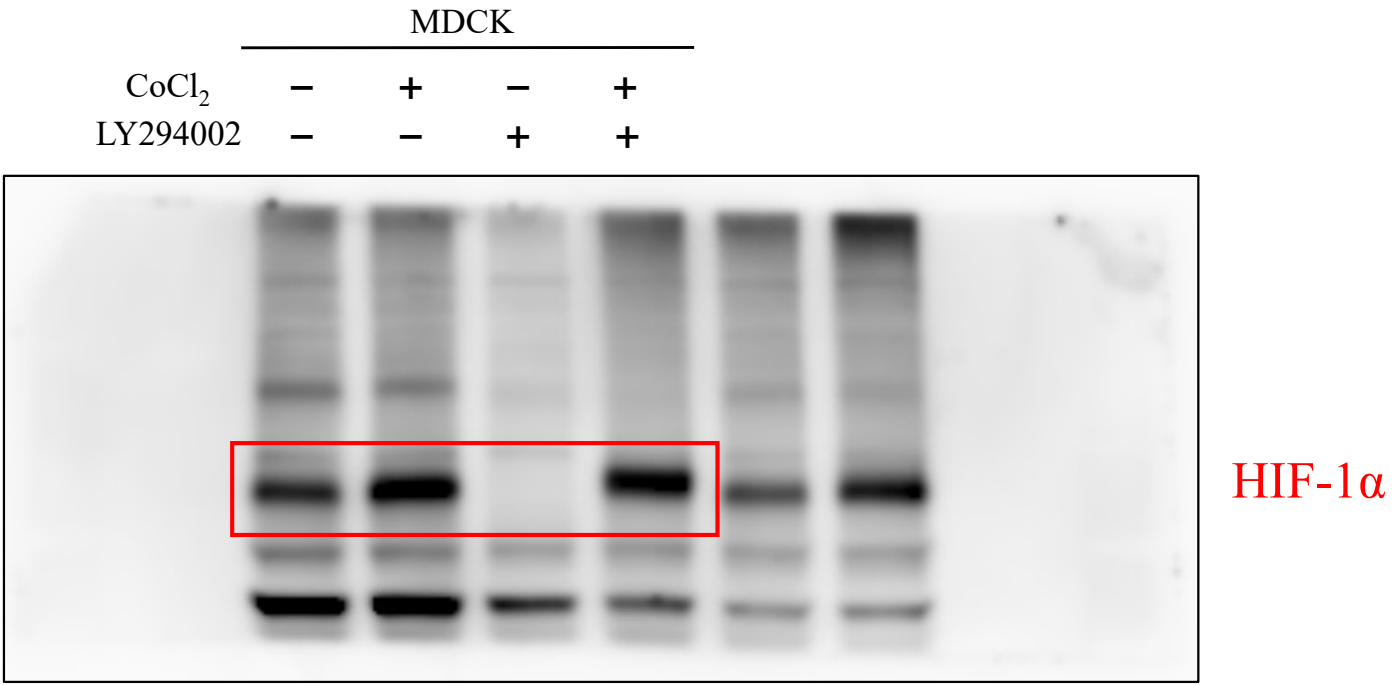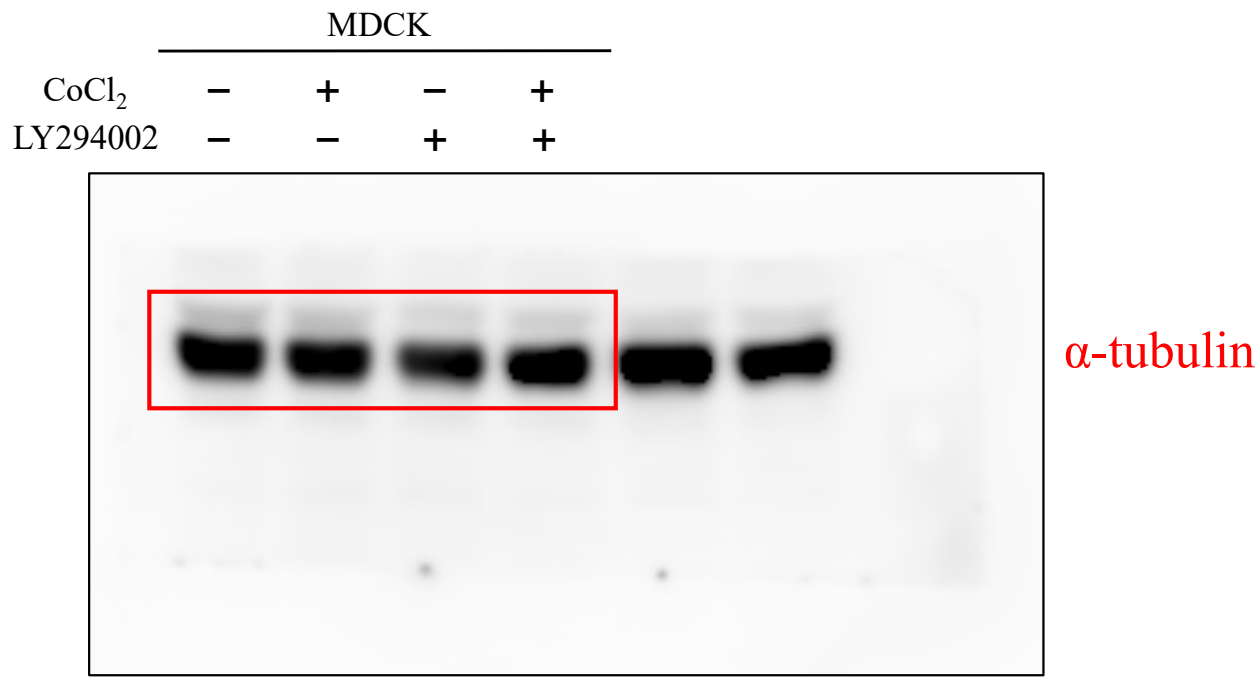

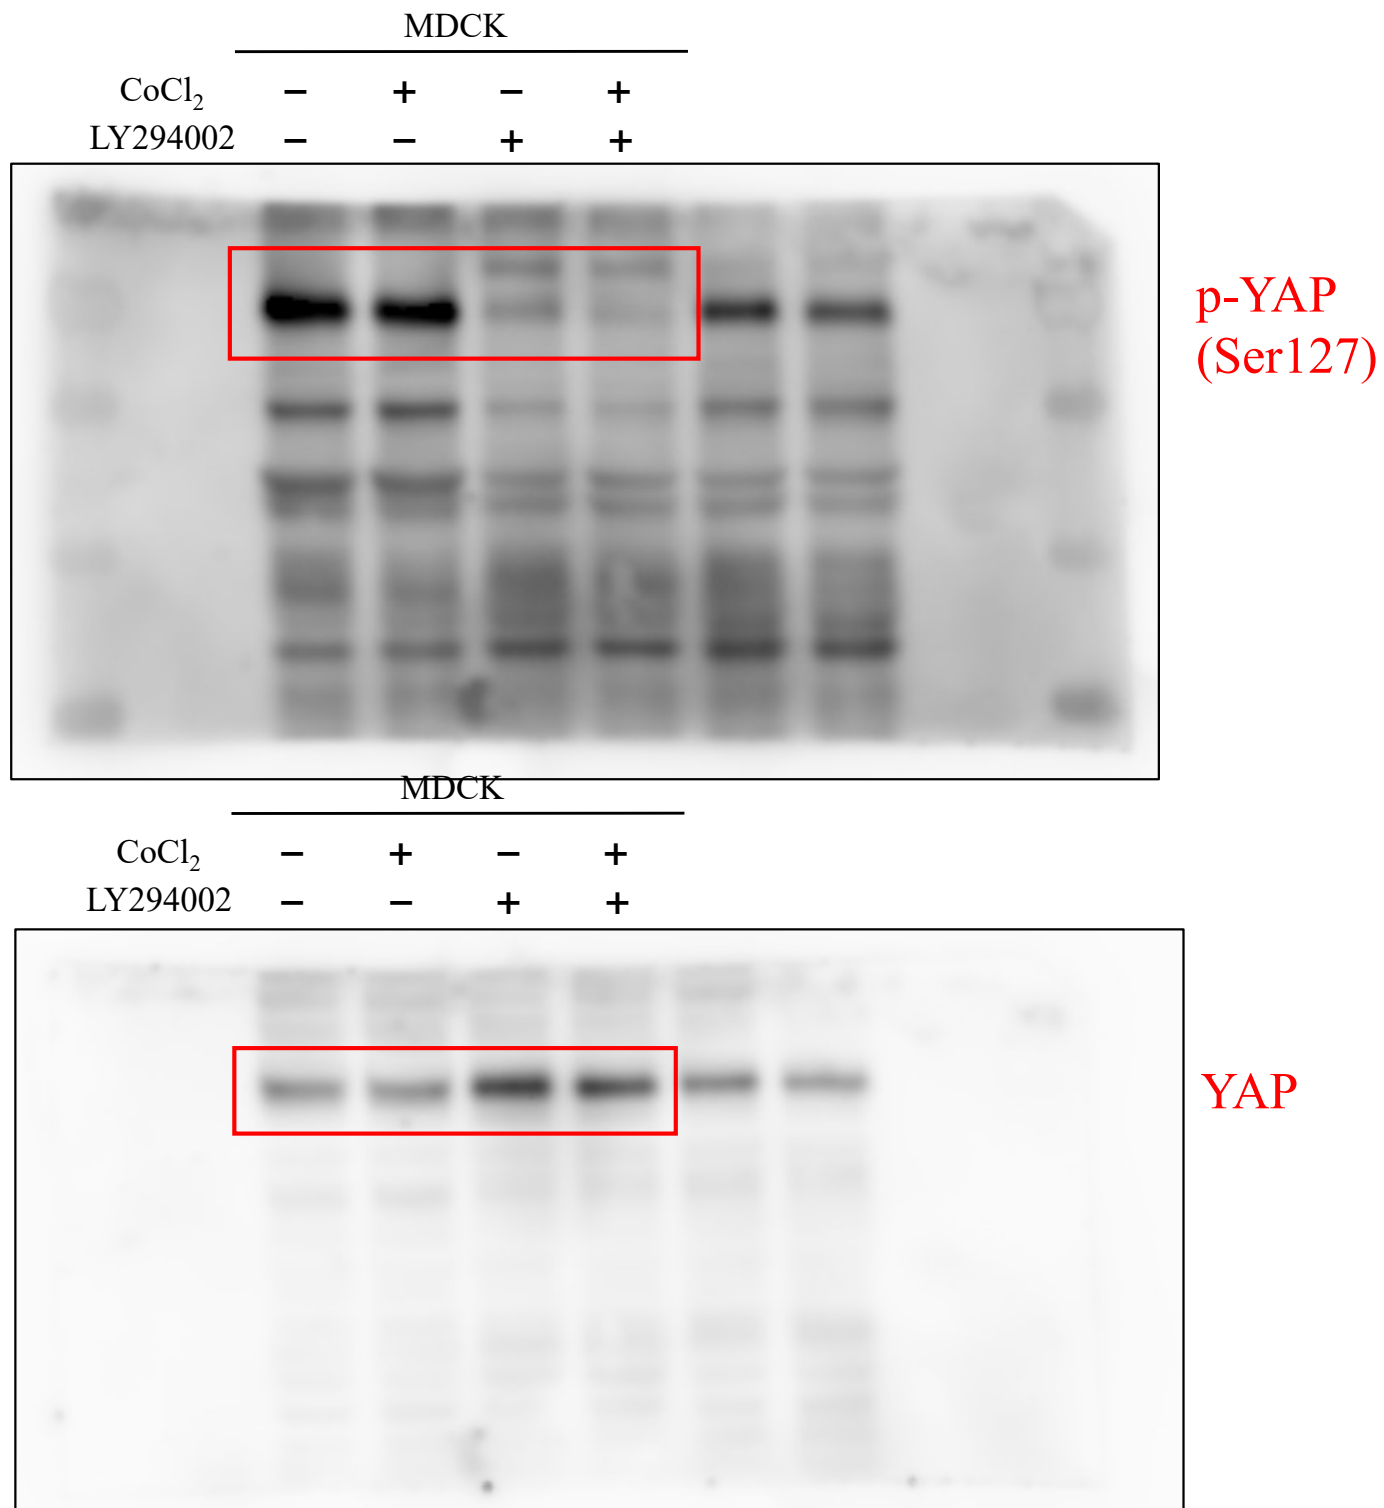



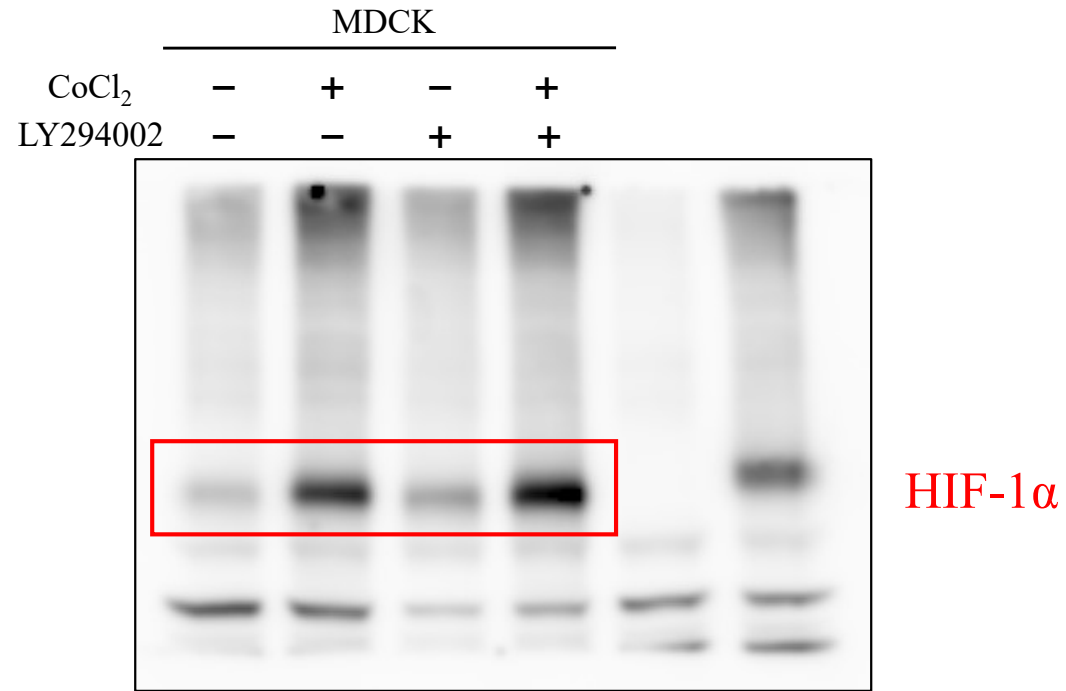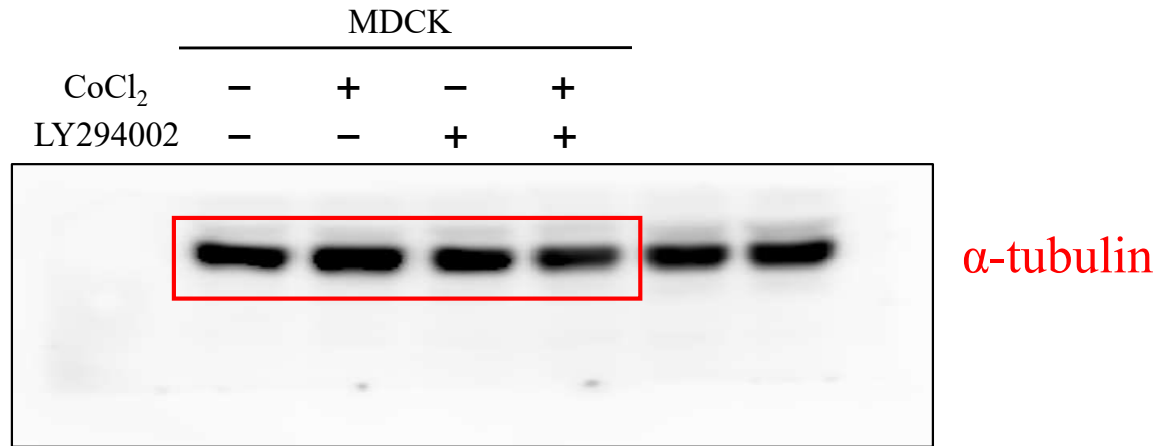

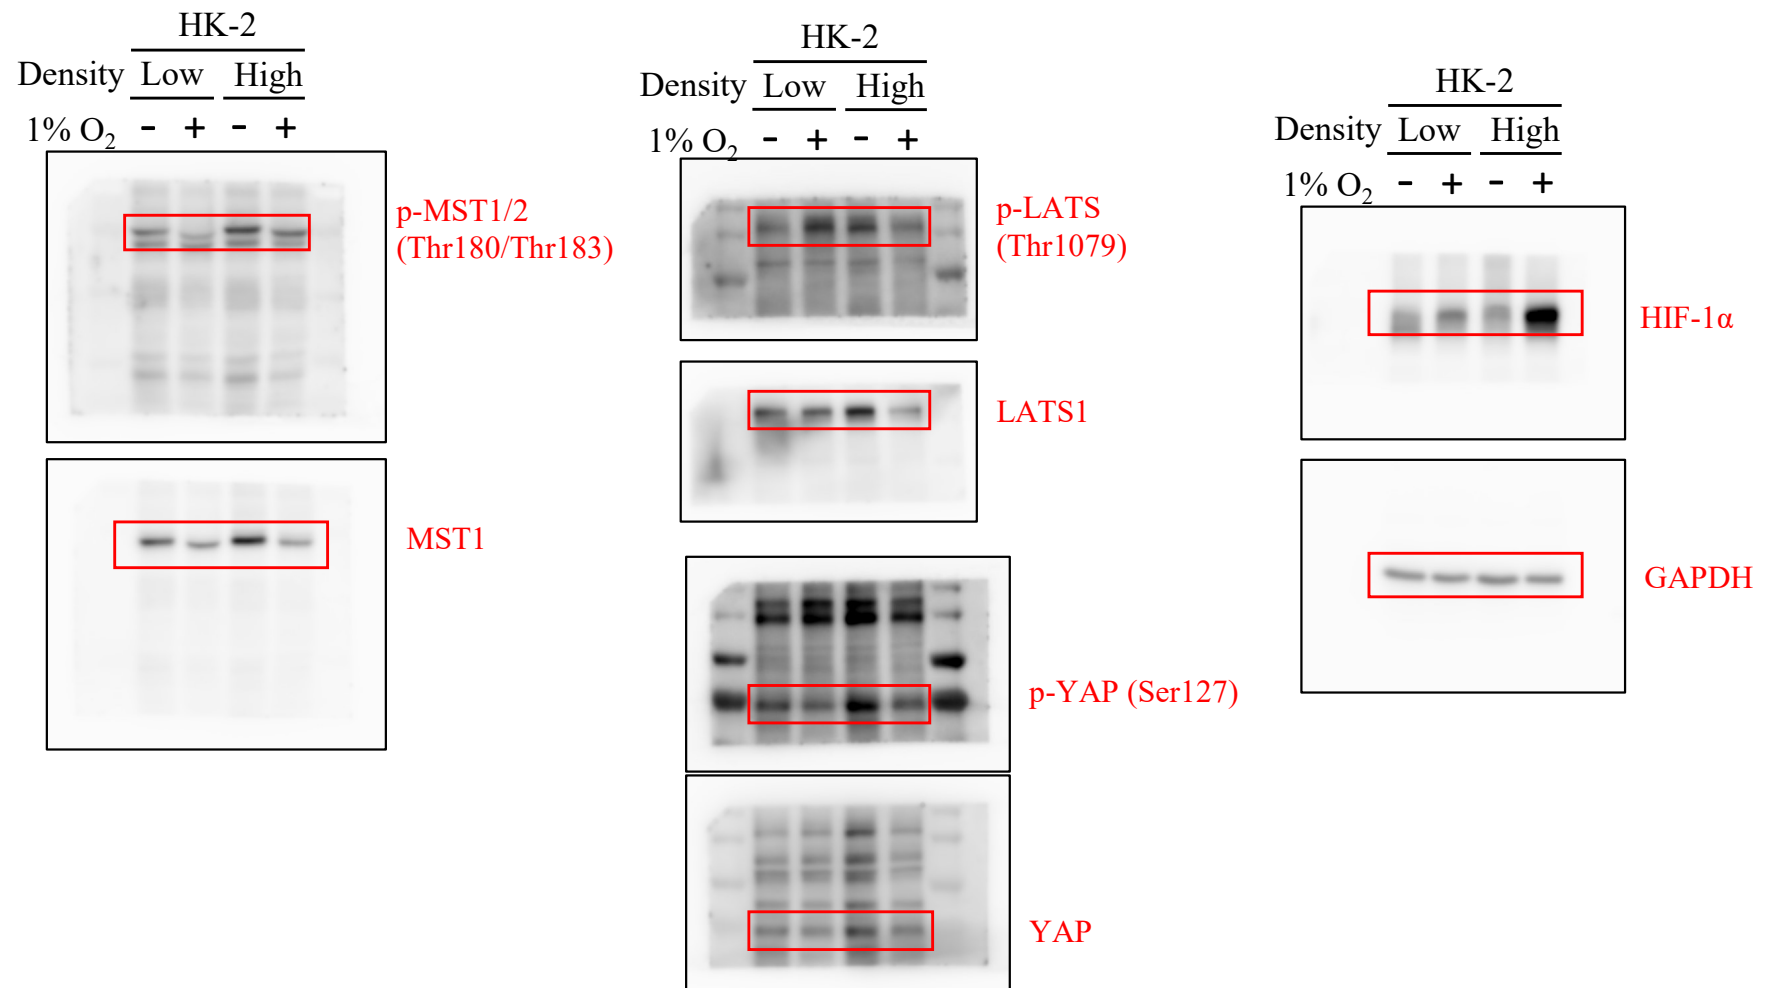

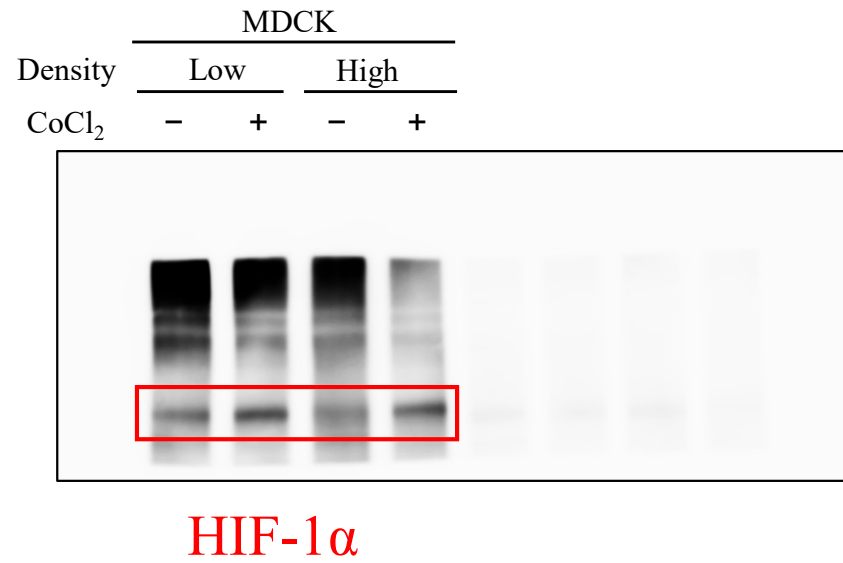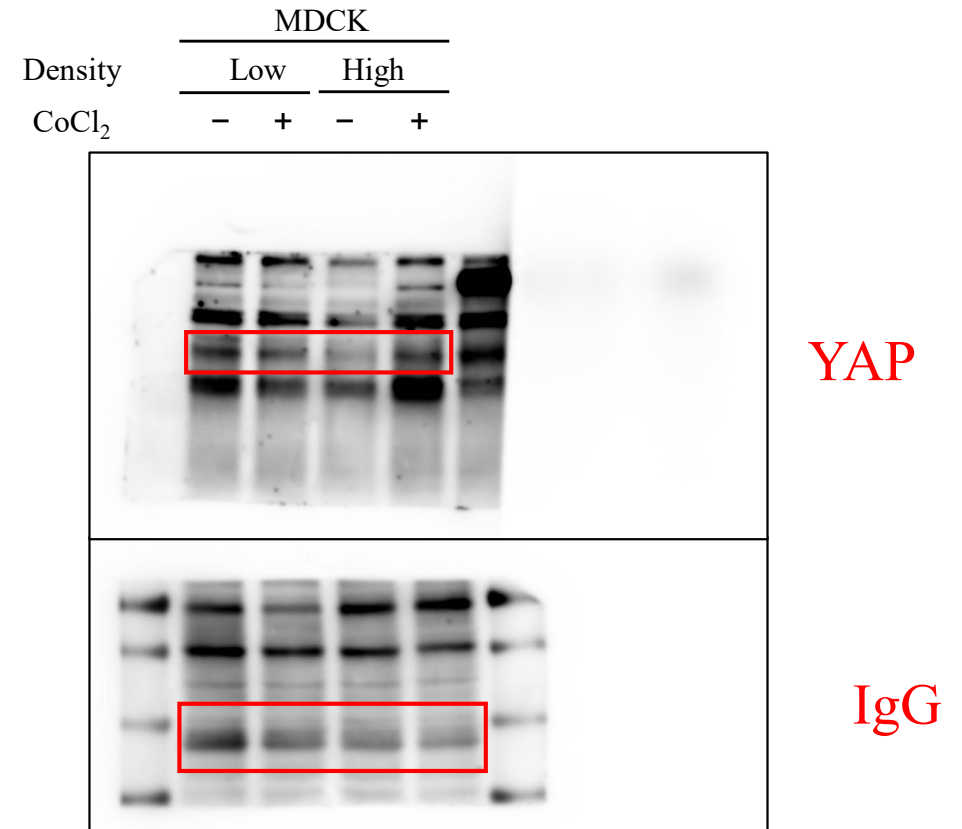

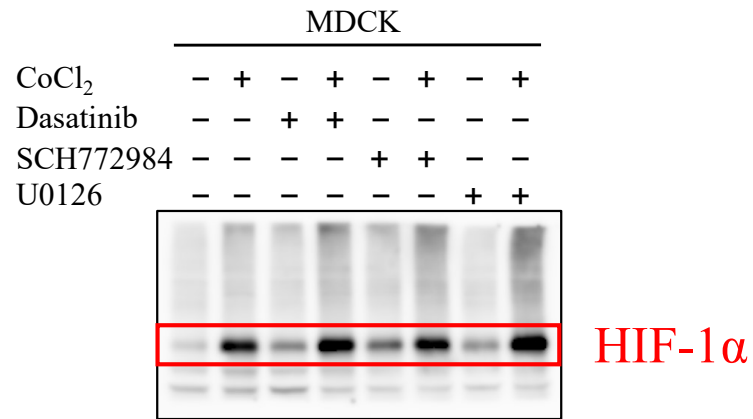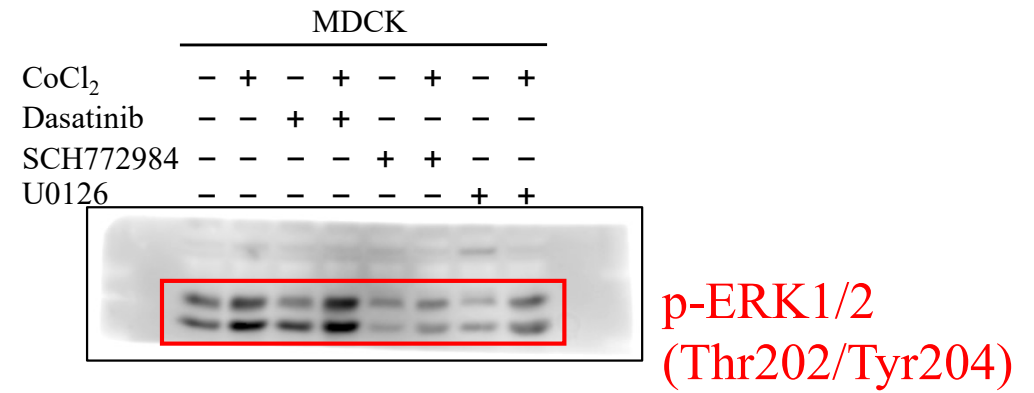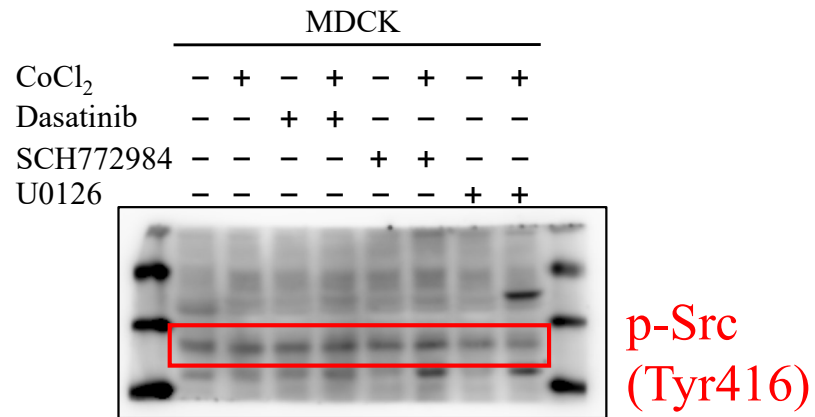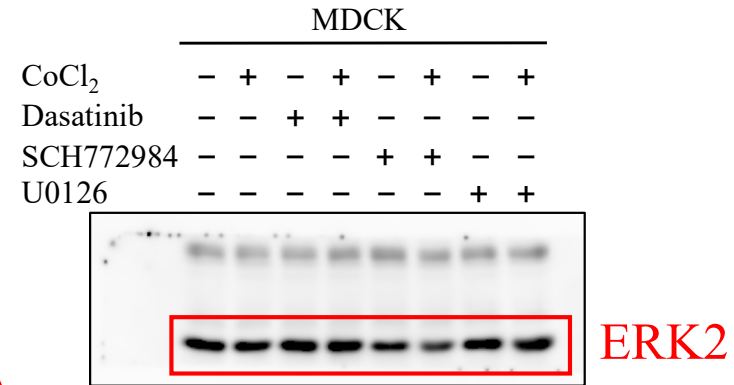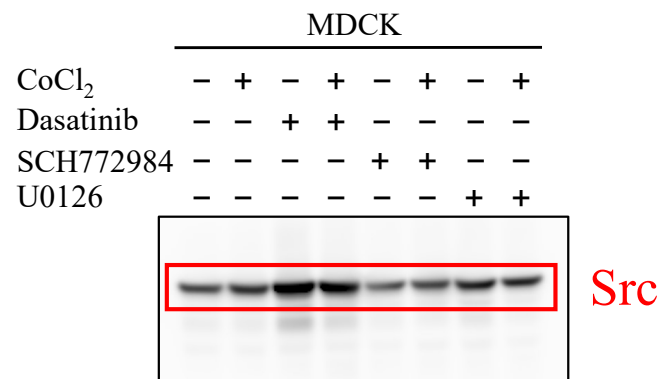

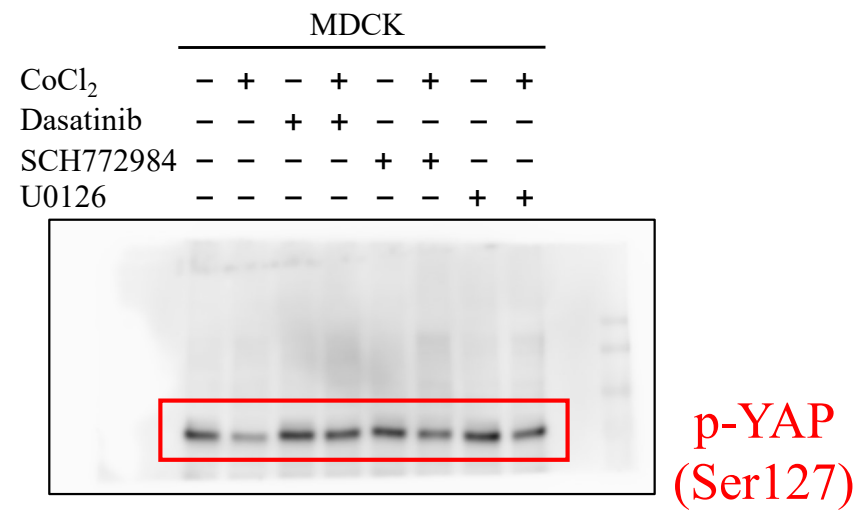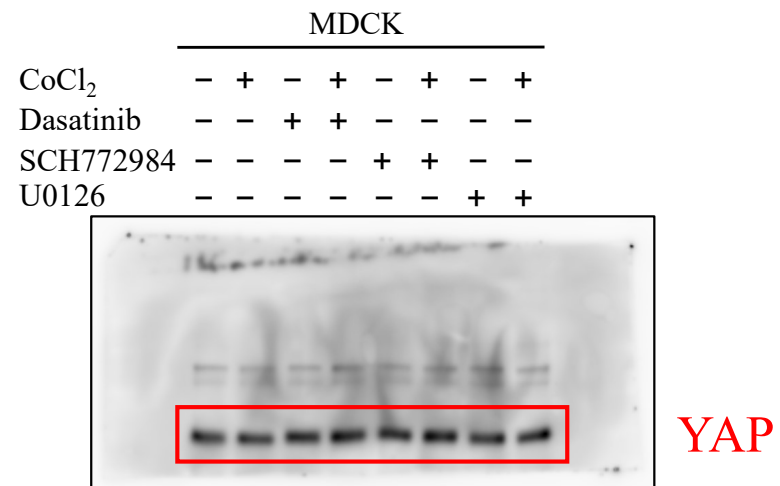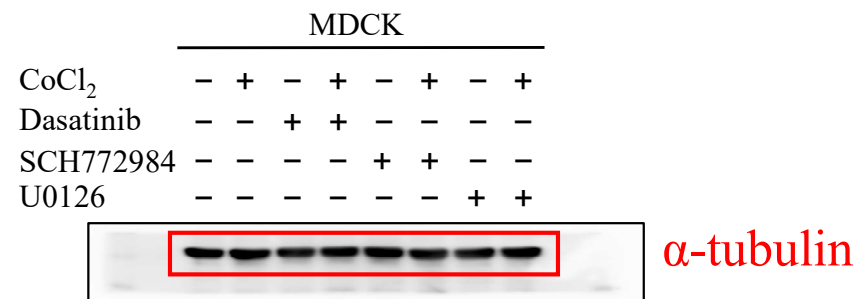

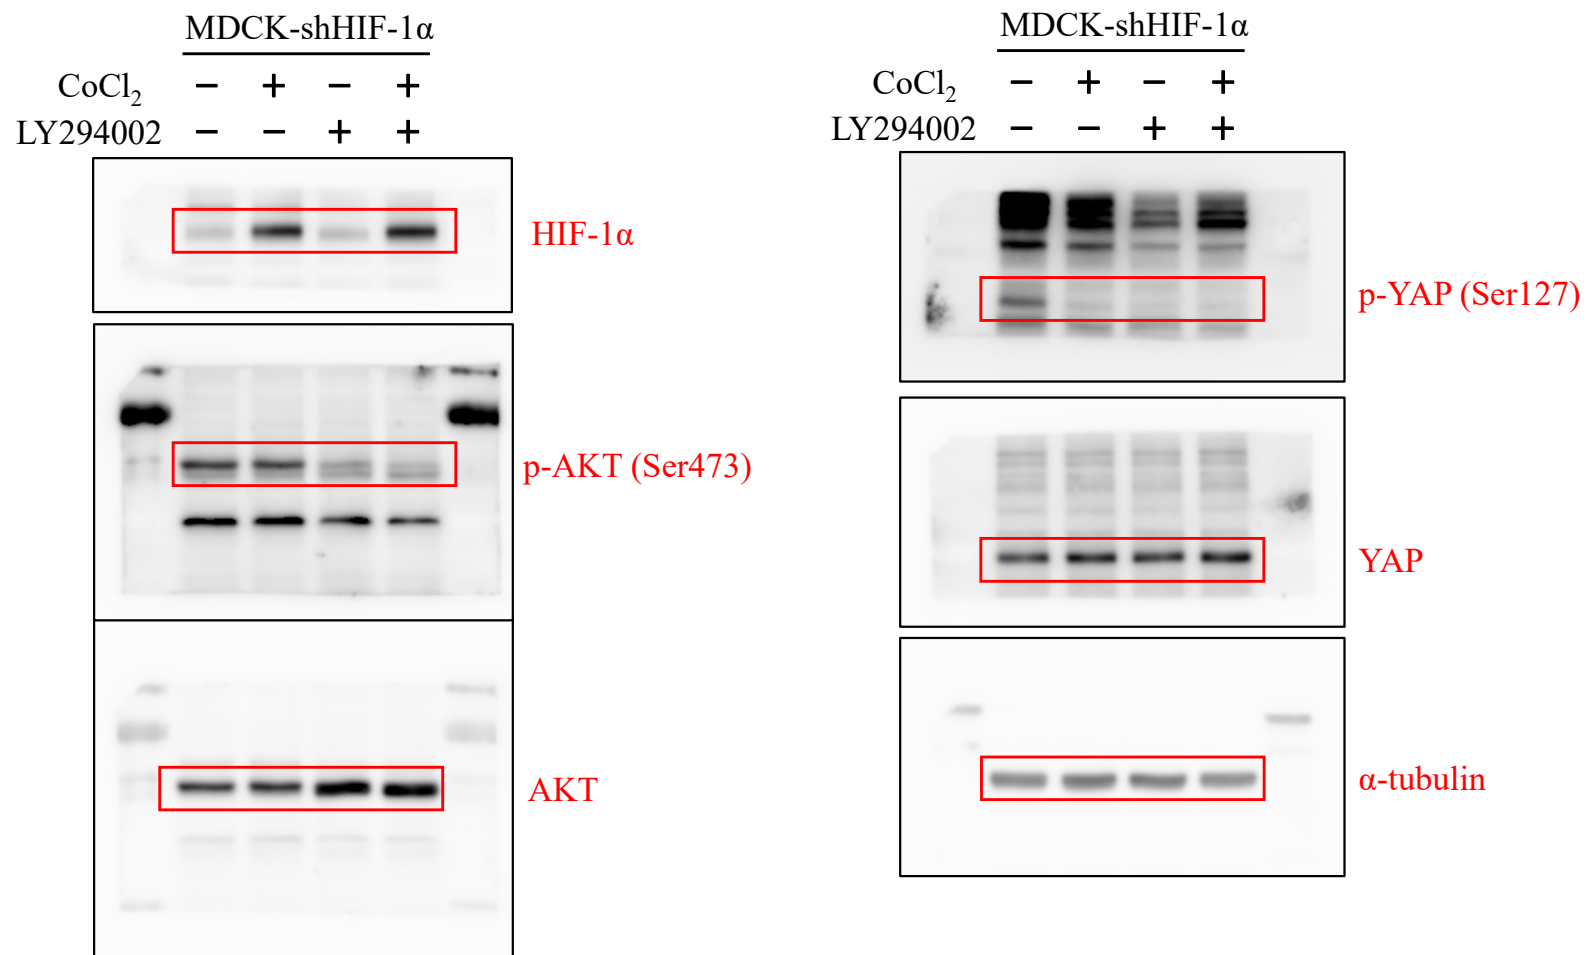

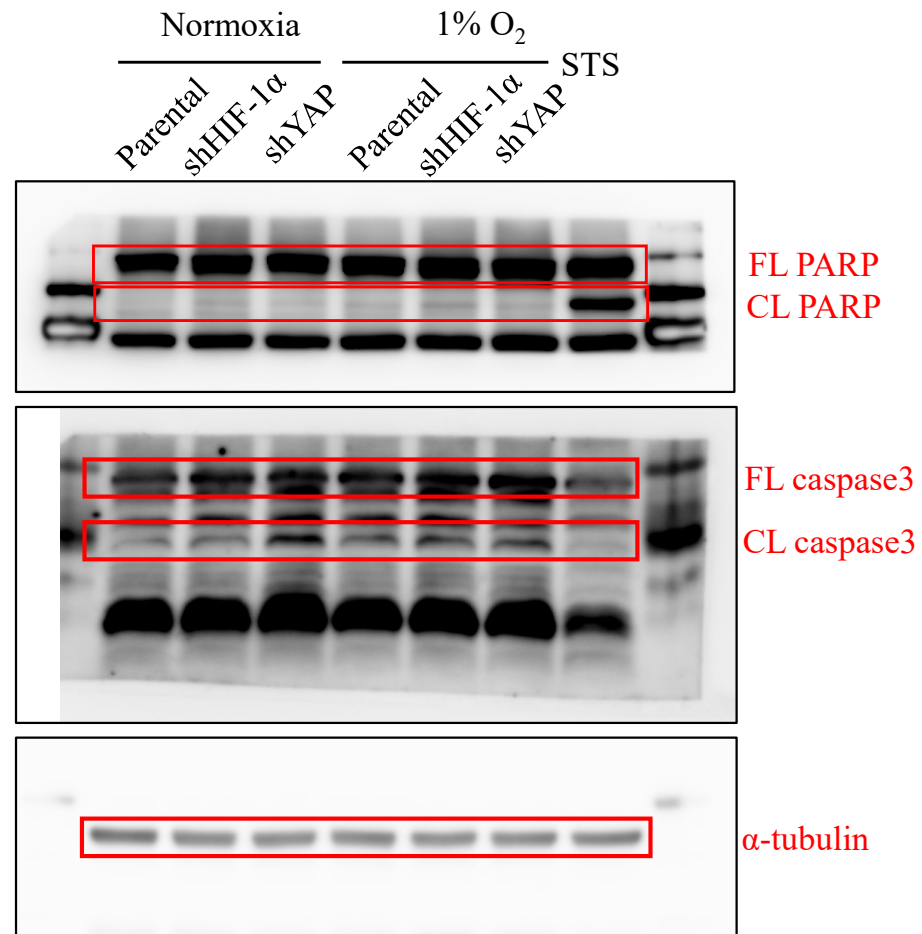

Supplement: 41420_2023_1687_MOESM2_ESM.pdf [file 41420_2023_1687_MOESM2_ESM.pdf]
